# Supplementary material for: Surveys in northern Utah for egg parasitoids of Halyomorphahalys (Stål) (Hemiptera: Pentatomidae) detect Trissolcusjaponicus (Ashmead) (Hymenoptera: Scelionidae)
Source: Biodivers Data J. 2020 Aug 13;8:e53363. doi: 10.3897/BDJ.8.e53363 (PMC7441073; doi:10.3897/BDJ.8.e53363)
Supplement: Supplementary material 2 — Comprehensive data file for all lab-reared (H) and wild (N) egg mass parasitism in Utah 2017–2019 [file bdj-08-e53363-s002.csv]

Mass #	Loc	site_number	coordinates	Habitat	plant_species	SB sp	EggType	Out	In	Year	ColFed#Eggs	Total_Eggs	Hatch	CP	ICP	SS	P, NP	HF	Par	Sunk	Un, W	Un, D	Mis	Total	BG	UNE par	Nym	E	Notes	Par_Sp 1 ID	Count1	T. japonicus	NativeTotal	Absent	Anastatus mirabilis	Anastatus pearsalli	Anastatus reduvii	T. eushisti	T. hullensis	ProportionParPerMass	PercentParPerMass	PercentParPerMass_T.japonicus	Sp 2 ID	Count2	TJ redistribution	Guarding_Wasp 1	Wasp 2	Wasp 3	Egg_Origin
80	Quest	14	40°46'03.3"N, 111°49'27.5"W	wooded edge by no crop	Acer grandidentatum	Halyomorpha halys	N	NA	7/26/2018	2018	0	22	14	0	0	0	0	0	1	2	5	0	0	7	0	0	4	0	Anastus sp. emerged	Anastatus pearsalli	1	0	1	0	0	1	0	0	0	0.045454545	4.55	0							NJFR
61	3	5	41°43'41.968"N, 111°49'4.005"W	Urban	Acer negundo	Halyomorpha halys	H	8/24/2017	8/27/2017	2017	0	21	1	0	0	0	0	0	0	0	19	0	0	21	0	0	19	0			0	0	0	0	0	0	0	0	0	0	0	0
62	3	5	41°43'41.968"N, 111°49'4.005"W	Urban	Acer negundo	Halyomorpha halys	H	8/24/2017	8/27/2017	2017	0	28	0	0	0	0	0	0	0	0	14	0	0	28	0	0	14	0			0	0	0	0	0	0	0	0	0	0	0	0
63	3	5	41°43'41.968"N, 111°49'4.005"W	Urban	Acer negundo	Halyomorpha halys	H	8/24/2017	8/27/2017	2017	0	25	0	0	0	0	0	0	0	0	1	0	0	25	0	0	1	0			0	0	0	0	0	0	0	0	0	0	0	0
72	3	5	41°43'41.968"N, 111°49'4.005"W	Urban	Acer negundo	Halyomorpha halys	H	8/29/2017	9/1/2017	2017	0	28	21	0	0	0	0	0	0	0	5	0	0	28	0	0	5	0			0	0	0	0	0	0	0	0	0	0	0	0
73	3	5	41°43'41.968"N, 111°49'4.005"W	Urban	Acer negundo	Halyomorpha halys	H	8/29/2017	9/1/2017	2017	0	27	9	0	0	0	0	0	0	0	7	0	1	27	0	0	7	0			0	0	0	0	0	0	0	0	0	0	0	0
102	3	5	41°43'41.968"N, 111°49'4.005"W	Urban	Acer negundo	Halyomorpha halys	H	9/9/2017	9/12/2017	2017	0	26	6	0	0	0	0	0	0	0	20	0	0	26	0	0	20	0			0	0	0	0	0	0	0	0	0	0	0	0							NJFR
103	3	5	41°43'41.968"N, 111°49'4.005"W	Urban	Acer negundo	Halyomorpha halys	H	9/9/2017	9/12/2017	2017	0	26	0	0	0	0	0	0	0	0	26	0	0	26	0	0	26	0			0	0	0	0	0	0	0	0	0	0	0	0
104	3	5	41°43'41.968"N, 111°49'4.005"W	Urban	Acer negundo	Halyomorpha halys	H	9/9/2017	9/12/2017	2017	0	29	3	0	0	0	0	0	0	0	26	0	0	29	0	0	26	0			0	0	0	0	0	0	0	0	0	0	0	0
114	3	5	41°43'41.968"N, 111°49'4.005"W	Urban	Acer negundo	Halyomorpha halys	H	9/14/2017	9/17/2017	2017	0	28	12	0	0	1	0	0	0	0	15	0	0	28	0	0	15	0			0	0	0	0	0	0	0	0	0	0	0	0
115	3	5	41°43'41.968"N, 111°49'4.005"W	Urban	Acer negundo	Halyomorpha halys	H	9/14/2017	9/17/2017	2017	0	27	11	0	0	0	0	0	0	0	16	0	0	27	0	0	16	0			0	0	0	0	0	0	0	0	0	0	0	0
116	3	5	41°43'41.968"N, 111°49'4.005"W	Urban	Acer negundo	Halyomorpha halys	H	9/14/2017	9/17/2017	2017	0	28	0	0	0	0	0	0	0	0	28	0	0	28	0	0	28	0			0	0	0	0	0	0	0	0	0	0	0	0
56	Grateful Tomato	11	40°45'08.2"N, 111°52'25.2"W	Urban	Acer negundo	Halyomorpha halys	H	10/3/2018	10/6/2018	2018	0	5	0		0	0	0	0	0	5	0	0	0	5	0	0	0	0				0	0	0	0	0	0	0	0	0	0	0
57	Grateful Tomato	11	40°45'08.2"N, 111°52'25.2"W	Urban	Acer negundo	Halyomorpha halys	H	10/3/2018	10/6/2018	2018	0	13	7	0	0	0	0	0	0	4	0	2	0	6	0	0	2	0				0	0	0	0	0	0	0	0	0	0	0
61	Velo	10	40°59'44.2"N, 111°53'09.8"W	wooded edge by no crop	Ailanthus altissima	Halyomorpha halys	H	6/25/2018	6/27/2018	2018	0	27	4	0	0	0	0	0	0	4	14	5	0	23	0	0	21	0				0	0	0	0	0	0	0	0	0	0	0
62	Velo	10	40°59'44.2"N, 111°53'09.8"W	wooded edge by no crop	Ailanthus altissima	Halyomorpha halys	H	6/25/2018	6/27/2018	2018	0	28	0	0	0	0	0	0	0	0	0	0	28	0	0	0	0	0				0	0	0	0	0	0	0	0	0	0	0
63	Velo	10	40°59'44.2"N, 111°53'09.8"W	wooded edge by no crop	Ailanthus altissima	Halyomorpha halys	H	6/25/2018	6/27/2018	2018	0	28	0	0	0	0	0	0	0	28	0	0	0	28	2	0	26	0				0	0	0	0	0	0	0	0	0	0	0
64	Velo	10	40°59'44.2"N, 111°53'09.8"W	wooded edge by no crop	Ailanthus altissima	Halyomorpha halys	H	6/25/2018	6/27/2018	2018	0	28	23	0	0	0	0	0	0	5	0	0	0	5	3	0	2	0				0	0	0	0	0	0	0	0	0	0	0
65	Velo	10	40°59'44.2"N, 111°53'09.8"W	wooded edge by no crop	Ailanthus altissima	Halyomorpha halys	H	6/25/2018	6/27/2018	2018	0	28	3	0	0	0	0	0	0	21	3	1	0	25	6	0	14	0				0	0	0	0	0	0	0	0	0	0	0
72	Velo	10	40°59'44.2"N, 111°53'09.8"W	wooded edge by no crop	Ailanthus altissima	Halyomorpha halys	H	7/10/2018	7/12/2018	2018	0	20	0	0	0	0	0	0	0	20	0	0	0	20	0	0	3	0				0	0	0	0	0	0	0	0	0	0	0
73	Velo	10	40°59'44.2"N, 111°53'09.8"W	wooded edge by no crop	Ailanthus altissima	Halyomorpha halys	H	7/10/2018	7/12/2018	2018	0	28	5	0	0	0	0	0	0	3	1	19	0	23	0	0	20	0				0	0	0	0	0	0	0	0	0	0	0
22	Kite	1	40°46'14.8"N, 111°51'18.6"W	Urban	Catalpa speciosa	Halyomorpha halys	H	7/18/2017	7/20/2017	2017	0	27	11	0	0	0	0	0	5	0	11	5	0	27	0	0	11	0		Trissolcus euschisti	5	0	5	0	0	0	0	5	0	0.185185185	18.52	0							NJFR
1	Kite	1	40°46'14.8"N, 111°51'18.6"W	Urban	Catalpa speciosa	Halyomorpha halys	H	6/20/2017	6/22/2017	2017	0	25	2	0	0	0	0	0	0	5	17	1	0	25	0	0	18	0			0	0	0	0	0	0	0	0	0	0	0	0
2	Kite	1	40°46'14.8"N, 111°51'18.6"W	Urban	Catalpa speciosa	Halyomorpha halys	H	6/20/2017	6/22/2017	2017	0	27	19	0	0	0	0	0	0	2	3	2	1	27	0	0	5	0			0	0	0	0	0	0	0	0	0	0	0	0
3	Kite	1	40°46'14.8"N, 111°51'18.6"W	Urban	Catalpa speciosa	Halyomorpha halys	H	6/20/2017	6/22/2017	2017	0	28	23	0	0	0	0	0	0	0	2	2	1	28	0	0	4	0			0	0	0	0	0	0	0	0	0	0	0	0
4	Kite	1	40°46'14.8"N, 111°51'18.6"W	Urban	Catalpa speciosa	Halyomorpha halys	H	6/20/2017	6/22/2017	2017	0	28	24	0	0	0	0	0	0	1	3	0	0	28	0	0	0	0	1 had green goo chunks, 2 empty unhatched		0	0	0	0	0	0	0	0	0	0	0	0
5	Kite	1	40°46'14.8"N, 111°51'18.6"W	Urban	Catalpa speciosa	Halyomorpha halys	H	6/20/2017	6/22/2017	2017	0	27	1	0	0	0	0	0	0	11	8	7	0	27	0	0	15	0	4 black goo on sunken		0	0	0	0	0	0	0	0	0	0	0	0
6	Kite	1	40°46'14.8"N, 111°51'18.6"W	Urban	Catalpa speciosa	Halyomorpha halys	H	6/20/2017	6/22/2017	2017	0	11	10	0	0	0	0	0	0	0	0	1	0	11	1	0	0	0			0	0	0	0	0	0	0	0	0	0	0	0
10	Kite	1	40°46'14.8"N, 111°51'18.6"W	Urban	Catalpa speciosa	Halyomorpha halys	H	7/18/2017	7/20/2017	2017	0	27	12	0	0	0	0	0	0	0	15	0	0	27	0	0	14	0	1 white unhatched empty egg		0	0	0	0	0	0	0	0	0	0	0	0
11	Kite	1	40°46'14.8"N, 111°51'18.6"W	Urban	Catalpa speciosa	Halyomorpha halys	H	7/18/2017	7/20/2017	2017	0	26	2	0	0	0	0	0	0	0	24	0	0	26	0	0	24	0			0	0	0	0	0	0	0	0	0	0	0	0
12	Kite	1	40°46'14.8"N, 111°51'18.6"W	Urban	Catalpa speciosa	Halyomorpha halys	H	7/18/2017	7/20/2017	2017	0	24	10	0	0	0	0	0	0	2	8	4	0	24	3	0	9	0			0	0	0	0	0	0	0	0	0	0	0	0
13	Kite	1	40°46'14.8"N, 111°51'18.6"W	Urban	Catalpa speciosa	Halyomorpha halys	H	7/18/2017	7/20/2017	2017	0	28	24	0	0	0	0	0	0	0	4	0	0	28	0	0	3	0	1 white unhatched empty egg		0	0	0	0	0	0	0	0	0	0	0	0
14	Kite	1	40°46'14.8"N, 111°51'18.6"W	Urban	Catalpa speciosa	Halyomorpha halys	H	7/18/2017	7/20/2017	2017	0	28	5	0	0	4	0	0	0	0	19	0	0	28	0	0	2	0	21 empty white unhatched		0	0	0	0	0	0	0	0	0	0	0	0
15	Kite	1	40°46'14.8"N, 111°51'18.6"W	Urban	Catalpa speciosa	Halyomorpha halys	H	7/18/2017	7/20/2017	2017	0	28	10	0	0	0	0	0	0	1	17	0	0	28	0	0	0	0	18 empty white unhatched		0	0	0	0	0	0	0	0	0	0	0	0
16	Kite	1	40°46'14.8"N, 111°51'18.6"W	Urban	Catalpa speciosa	Halyomorpha halys	H	7/18/2017	7/20/2017	2017	0	28	6	0	0	7	0	0	0	0	11	4	0	28	4	0	9	0	7 empty		0	0	0	0	0	0	0	0	0	0	0	0
17	Kite	1	40°46'14.8"N, 111°51'18.6"W	Urban	Catalpa speciosa	Halyomorpha halys	H	7/18/2017	7/20/2017	2017	0	22	5	0	0	0	0	0	0	3	8	5	1	22	8	0	4	0	4 empty		0	0	0	0	0	0	0	0	0	0	0	0
18	Kite	1	40°46'14.8"N, 111°51'18.6"W	Urban	Catalpa speciosa	Halyomorpha halys	H	7/18/2017	7/20/2017	2017	0	5	1	0	0	0	0	0	0	0	1	3	0	5	1	0	3	0			0	0	0	0	0	0	0	0	0	0	0	0
19	Kite	1	40°46'14.8"N, 111°51'18.6"W	Urban	Catalpa speciosa	Halyomorpha halys	H	7/18/2017	7/20/2017	2017	0	5	1	0	0	0	0	0	0	0	1	3	0	5	1	0	3	0			0	0	0	0	0	0	0	0	0	0	0	0
20	Kite	1	40°46'14.8"N, 111°51'18.6"W	Urban	Catalpa speciosa	Halyomorpha halys	H	7/18/2017	7/20/2017	2017	0	3	1	0	0	0	0	0	0	0	1	1	0	3	0	0	2	0			0	0	0	0	0	0	0	0	0	0	0	0
21	Kite	1	40°46'14.8"N, 111°51'18.6"W	Urban	Catalpa speciosa	Halyomorpha halys	H	7/18/2017	7/20/2017	2017	0	28	22	0	0	0	0	0	0	1	3	2	0	28	0	0	3	0	2 empty white egg		0	0	0	0	0	0	0	0	0	0	0	0
23	Kite	1	40°46'14.8"N, 111°51'18.6"W	Urban	Catalpa speciosa	Halyomorpha halys	H	7/18/2017	7/20/2017	2017	0	19	0	0	0	0	0	0	0	3	4	10	0	19	3	0	16	0	the goo was white and dried up		0	0	0	0	0	0	0	0	0	0	0	0
24	Kite	1	40°46'14.8"N, 111°51'18.6"W	Urban	Catalpa speciosa	Halyomorpha halys	H	7/18/2017	7/20/2017	2017	0	4	0	0	0	0	0	0	0	0	4	0	0	4	4	0	0	0	the goo was white and dried up		0	0	0	0	0	0	0	0	0	0	0	0
42	Kite	1	40°46'14.8"N, 111°51'18.6"W	Urban	Catalpa speciosa	Halyomorpha halys	H	9/5/2017	9/7/2017	2017	0	28	17	0	0	0	0	0	0	3	6	2	0	28	0	0	7	0	1 empty		0	0	0	0	0	0	0	0	0	0	0	0
43	Kite	1	40°46'14.8"N, 111°51'18.6"W	Urban	Catalpa speciosa	Halyomorpha halys	H	9/5/2017	9/7/2017	2017	0	24	8	0	0	0	0	0	0	4	6	6	0	24	0	0	9	0	3 empty		0	0	0	0	0	0	0	0	0	0	0	0
44	Kite	1	40°46'14.8"N, 111°51'18.6"W	Urban	Catalpa speciosa	Halyomorpha halys	H	9/5/2017	9/7/2017	2017	0	29	19	0	0	0	0	0	0	1	7	2	0	29	2	0	7	0			0	0	0	0	0	0	0	0	0	0	0	0
45	Kite	1	40°46'14.8"N, 111°51'18.6"W	Urban	Catalpa speciosa	Halyomorpha halys	H	9/5/2017	9/7/2017	2017	0	23	0	0	0	0	0	0	0	17	3	3	0	23	0	0	6	0			0	0	0	0	0	0	0	0	0	0	0	0
46	Kite	1	40°46'14.8"N, 111°51'18.6"W	Urban	Catalpa speciosa	Halyomorpha halys	H	9/5/2017	9/7/2017	2017	0	28	11	0	0	0	0	0	0	7	8	2	0	28	1	0	6	0	3 empty		0	0	0	0	0	0	0	0	0	0	0	0
47	Kite	1	40°46'14.8"N, 111°51'18.6"W	Urban	Catalpa speciosa	Halyomorpha halys	H	9/5/2017	9/7/2017	2017	0	28	21	0	0	0	0	0	0	2	2	3	0	28	0	0	3	0	2 empty		0	0	0	0	0	0	0	0	0	0	0	0
48	Kite	1	40°46'14.8"N, 111°51'18.6"W	Urban	Catalpa speciosa	Halyomorpha halys	H	9/5/2017	9/7/2017	2017	0	26	0	0	0	0	0	0	0	13	8	5	0	26	0	0	13	0			0	0	0	0	0	0	0	0	0	0	0	0
49	Kite	1	40°46'14.8"N, 111°51'18.6"W	Urban	Catalpa speciosa	Halyomorpha halys	H	9/5/2017	9/7/2017	2017	0	29	1	0	0	0	0	0	0	5	11	2	0	29	1	0	12	0			0	0	0	0	0	0	0	0	0	0	0	0
50	Kite	1	40°46'14.8"N, 111°51'18.6"W	Urban	Catalpa speciosa	Halyomorpha halys	H	9/5/2017	9/7/2017	2017	0	28	2	0	0	0	0	0	0	9	15	0	0	28	1	0	14	0			0	0	0	0	0	0	0	0	0	0	0	0
51	Kite	1	40°46'14.8"N, 111°51'18.6"W	Urban	Catalpa speciosa	Halyomorpha halys	H	9/5/2017	9/7/2017	2017	0	27	2	0	0	0	0	0	0	7	11	7	0	27	0	0	18	0			0	0	0	0	0	0	0	0	0	0	0	0
52	Kite	1	40°46'14.8"N, 111°51'18.6"W	Urban	Catalpa speciosa	Halyomorpha halys	H	9/5/2017	9/7/2017	2017	0	27	7	0	0	0	0	0	0	0	9	11	0	27	0	0	20	0			0	0	0	0	0	0	0	0	0	0	0	0
43	Kite	1	40°46'14.8"N, 111°51'18.6"W	Urban	Catalpa speciosa	Halyomorpha halys	H	8/10/2018	8/13/2018	2018	0	28	16	0	0	0	0	0	0	2	0	10	0	12	0	0	11	0	Eggs from 8/9			0	0	0	0	0	0	0	0	0	0	0
44	Kite	1	40°46'14.8"N, 111°51'18.6"W	Urban	Catalpa speciosa	Halyomorpha halys	H	8/10/2018	8/13/2018	2018	0	27	11	0	0	0	0	0	0	6	10	0	0	16	0	0	12	0	Eggs from 8/9			0	0	0	0	0	0	0	0	0	0	0
47	Kite	1	40°46'14.8"N, 111°51'18.6"W	Urban	Catalpa speciosa	Halyomorpha halys	H	8/10/2018	8/13/2018	2018	0	26	15	0	0	0	0	0	0	5	6	0	0	11	0	0	4	0				0	0	0	0	0	0	0	0	0	0	0
12	Kite	1	40°46'14.8"N, 111°51'18.6"W	Urban	Catalpa speciosa	Halyomorpha halys	H	6/21/2019	6/24/2019	2019	0	26	23	0	0	0	0	0	0	0	1	2	0	26	2			1			0	0	0	0	0	0	0	0	0	0	0	0
13	Kite	1	40°46'14.8"N, 111°51'18.6"W	Urban	Catalpa speciosa	Halyomorpha halys	H	6/21/2019	6/24/2019	2019	0	28	19	0	0	0	0	0	0	0	0	9	0	28	9	0	0	0	Guarding female Trissolcus		0	0	0	0	0	0	0	0	0	0	0	0				Trissolcus sp.
14	Kite	1	40°46'14.8"N, 111°51'18.6"W	Urban	Catalpa speciosa	Halyomorpha halys	H	6/21/2019	6/24/2019	2019	0	28	4	0	0	0	0	0	0	0	1	23	0	28	23	0	0	1			0	0	0	0	0	0	0	0	0	0	0	0
15	Kite	1	40°46'14.8"N, 111°51'18.6"W	Urban	Catalpa speciosa	Halyomorpha halys	H	6/21/2019	6/24/2019	2019	0	28	4	0	0	0	0	0	0	0	1	23	0	28	23	0	0	1	same data on two egg masses…creepy		0	0	0	0	0	0	0	0	0	0	0	0
16	Kite	1	40°46'14.8"N, 111°51'18.6"W	Urban	Catalpa speciosa	Halyomorpha halys	H	6/21/2019	6/24/2019	2019	0	28	16	0	0	0	0	0	0	0	2	10	0	28	10	0	0	2			0	0	0	0	0	0	0	0	0	0	0	0
17	Kite	1	40°46'14.8"N, 111°51'18.6"W	Urban	Catalpa speciosa	Halyomorpha halys	H	6/21/2019	6/24/2019	2019	0	28	20	0	0	0	0	0	0	0	0	8	0	28	8	0	0	0			0	0	0	0	0	0	0	0	0	0	0	0
18	Kite	1	40°46'14.8"N, 111°51'18.6"W	Urban	Catalpa speciosa	Halyomorpha halys	H	6/21/2019	6/24/2019	2019	0	28	24	0	0	0	0	0	0	0	0	4	0	28	4	0	0	0			0	0	0	0	0	0	0	0	0	0	0	0
19	Kite	1	40°46'14.8"N, 111°51'18.6"W	Urban	Catalpa speciosa	Halyomorpha halys	H	6/21/2019	6/24/2019	2019	0	26	17	0	0	0	0	0	0	3	0	6	0	26	6	0	0	3			0	0	0	0	0	0	0	0	0	0	0	0
20	Kite	1	40°46'14.8"N, 111°51'18.6"W	Urban	Catalpa speciosa	Halyomorpha halys	H	6/21/2019	6/24/2019	2019	0	20	9	0	0	0	0	0	0	0	0	11	0	20	11	0	0	0			0	0	0	0	0	0	0	0	0	0	0	0
21	Kite	1	40°46'14.8"N, 111°51'18.6"W	Urban	Catalpa speciosa	Halyomorpha halys	H	6/21/2019	6/24/2019	2019	0	25	6	0	0	0	0	0	0	11	7	1	0	25	12	0	0	7			0	0	0	0	0	0	0	0	0	0	0	0
22	Kite	1	40°46'14.8"N, 111°51'18.6"W	Urban	Catalpa speciosa	Halyomorpha halys	H	6/21/2019	6/24/2019	2019	0	27	27	0	0	0	0	0	0	0	0	0	0	27	0	0	0	0			0	0	0	0	0	0	0	0	0	0	0	0
50	Kite	1	40°46'14.8"N, 111°51'18.6"W	Urban	Catalpa speciosa	Halyomorpha halys	H	7/12/2019	7/17/2019	2019	0	28	20	0	0	0	0	0	0	0	0	8	0	28	8	0	0	0			0	0	0	0	0	0	0	0	0	0	0	0
51	Kite	1	40°46'14.8"N, 111°51'18.6"W	Urban	Catalpa speciosa	Halyomorpha halys	H	7/12/2019	7/17/2019	2019	0	29	24	0	0	0	0	0	0	0	4	1	0	29	1	0	0	4			0	0	0	0	0	0	0	0	0	0	0	0
52	Kite	1	40°46'14.8"N, 111°51'18.6"W	Urban	Catalpa speciosa	Halyomorpha halys	H	7/12/2019	7/17/2019	2019	0	28	0	0	0	0	0	0	0	3	13	12	0	28	15	0	0	13			0	0	0	0	0	0	0	0	0	0	0	0
102	Indigo	15	41°01'13.1"N, 111°56'12.9"W	Urban	Catalpa speciosa	Halyomorpha halys	H	9/10/2018	9/13/2018	2018	0	19	14	0	0	0	0	0	0	1	4	0	0	5	1	0	0	0				0	0	0	0	0	0	0	0	0	0	0
103	Indigo	15	41°01'13.1"N, 111°56'12.9"W	Urban	Catalpa speciosa	Halyomorpha halys	H	9/10/2018	9/13/2018	2018	0	6	3	0	0	0	0	0	0	0	0	3	0	3	0	0	3	0				0	0	0	0	0	0	0	0	0	0	0
104	Indigo	15	41°01'13.1"N, 111°56'12.9"W	Urban	Catalpa speciosa	Halyomorpha halys	H	9/10/2018	9/13/2018	2018	0	27	17	1	0	0	0	0	0	4	5	0	0	9	0	0	8	0				0	0	0	0	0	0	0	0	0	0	0
105	Indigo	15	41°01'13.1"N, 111°56'12.9"W	Urban	Catalpa speciosa	Halyomorpha halys	H	9/10/2018	9/13/2018	2018	0	27	12	0	0	0	0	0	0	4	11	0	0	15	0	0	1	0				0	0	0	0	0	0	0	0	0	0	0
106	Indigo	15	41°01'13.1"N, 111°56'12.9"W	Urban	Catalpa speciosa	Halyomorpha halys	H	9/10/2018	9/13/2018	2018	0	27	0	0	0	0	0	0	0	13	14	0	0	27	0	0	0	0				0	0	0	0	0	0	0	0	0	0	0
107	Indigo	15	41°01'13.1"N, 111°56'12.9"W	Urban	Catalpa speciosa	Halyomorpha halys	H	9/17/2018	9/20/2018	2018	0	28	0	0	0	0	0	0	0	27	0	0	1	27	0	0	5	0				0	0	0	0	0	0	0	0	0	0	0
108	Indigo	15	41°01'13.1"N, 111°56'12.9"W	Urban	Catalpa speciosa	Halyomorpha halys	H	9/17/2018	9/20/2018	2018	0	26	1	0	0	0	0	0	0	24	1	0	0	25	0	0	15	0				0	0	0	0	0	0	0	0	0	0	0
109	Indigo	15	41°01'13.1"N, 111°56'12.9"W	Urban	Catalpa speciosa	Halyomorpha halys	H	9/17/2018	9/20/2018	2018	0	30	27	0	0	0	0	0	0	0	1	0	2	1	0	0	0	0				0	0	0	0	0	0	0	0	0	0	0
110	Indigo	15	41°01'13.1"N, 111°56'12.9"W	Urban	Catalpa speciosa	Halyomorpha halys	H	9/17/2018	9/20/2018	2018	0	24	6	0	3	0	0	0	0	13	1	0	1	14	0	0	6	0				0	0	0	0	0	0	0	0	0	0	0
111	Indigo	15	41°01'13.1"N, 111°56'12.9"W	Urban	Catalpa speciosa	Halyomorpha halys	H	9/17/2018	9/20/2018	2018	0	21	16	0	0	0	0	0	0	3	2	0	0	5	0	0	3	0				0	0	0	0	0	0	0	0	0	0	0
112	Indigo	15	41°01'13.1"N, 111°56'12.9"W	Urban	Catalpa speciosa	Halyomorpha halys	H	9/17/2018	9/20/2018	2018	0	9	1	0	0	0	0	0	0	4	1	0	3	5	0	0	0	0				0	0	0	0	0	0	0	0	0	0	0
113	Indigo	15	41°01'13.1"N, 111°56'12.9"W	Urban	Catalpa speciosa	Halyomorpha halys	H	9/17/2018	9/20/2018	2018	0	28	23	0	0	0	0	0	0	0	2	0	3	2	0	0	0	0				0	0	0	0	0	0	0	0	0	0	0
114	Indigo	15	41°01'13.1"N, 111°56'12.9"W	Urban	Catalpa speciosa	Halyomorpha halys	H	9/17/2018	9/20/2018	2018	0	28	0	0	16	0	0	0	0	9	0	3	0	12	0	0	5	0				0	0	0	0	0	0	0	0	0	0	0
73	Kite	1	40°46'14.8"N, 111°51'18.6"W	Urban	Catalpa speciosa	Halyomorpha halys	N	NA	8/7/2019	2019	0	26	0	1	2	0	0	0	23	0	0	0	0	26	0	0	0	0		absent	23	0		23				0	0	0.884615385	88.46	88.46
79	Kite	1	40°46'14.8"N, 111°51'18.6"W	Urban	Catalpa speciosa	Halyomorpha halys	N	NA	8/7/2019	2019	0	30	0	0	0	0	0	0	27	0	0	3	0	30	0	0	0	0		absent	27	0		27	0	0		0	0	0.9	90	90
83	Kite	1	40°46'14.8"N, 111°51'18.6"W	Urban	Catalpa speciosa	Halyomorpha halys	N	NA	8/7/2019	2019	0	28	0	0	11	0	0	0	3	0	0	14	0	28	0	0	0	0		absent	3	0		3	0	0		0	0	0.107142857	10.71	10.71
84	Kite	1	40°46'14.8"N, 111°51'18.6"W	Urban	Catalpa speciosa	Halyomorpha halys	N	NA	8/7/2019	2019	0	28	0	0	0	0	0	0	19	1	0	8	0	28	0	0	0	0		absent	19	0		19	0	0		0	0	0.678571429	67.86	67.86
85	Kite	1	40°46'14.8"N, 111°51'18.6"W	Urban	Catalpa speciosa	Halyomorpha halys	N	NA	8/7/2019	2019	0	28	0	0	0	0	0	0	26	0	0	2	0	28	0	0	0	0		absent	26	0		26	0	0		0	0	0.928571429	92.86	92.86
87	Kite	1	40°46'14.8"N, 111°51'18.6"W	Urban	Catalpa speciosa	Halyomorpha halys	N	NA	8/7/2019	2019	0	28	0	0	0	0	0	0	20	0	7	1	0	28	0	0	0	0		absent	20	0		20	0	0		0	0	0.714285714	71.43	71.43
88	Kite	1	40°46'14.8"N, 111°51'18.6"W	Urban	Catalpa speciosa	Halyomorpha halys	N	NA	8/7/2019	2019	0	27	0	0	0	0	0	0	13	0	6	8	0	27	0	0	0	0	Unsure if parasitoids hatched out or eggs were chewed. Dark residue in those that were hatched/chewed.	absent	13	0		13	0	0		0	0	0.481481481	48.15	48.15
89	Kite	1	40°46'14.8"N, 111°51'18.6"W	Urban	Catalpa speciosa	Halyomorpha halys	N	NA	8/7/2019	2019	0	28	0	0	0	0	0	0	10	10	0	8	0	28	0	0	0	0		absent	10	0		10	0	0		0	0	0.357142857	35.71	35.71
95	Kite	1	40°46'14.8"N, 111°51'18.6"W	Urban	Catalpa speciosa	Halyomorpha halys	N	NA	8/15/2019	2019	0	28	0	0	1	0	0	0	20	0	0	7	0	28	0	0	0	0		absent	20	0		20	0	0		0	0	0.714285714	71.43	71.43
99	Kite	1	40°46'14.8"N, 111°51'18.6"W	Urban	Catalpa speciosa	Halyomorpha halys	N	NA	8/15/2019	2019	0	27	0	0	0	0	0	0	22	0	0	5	0	27	0	0	0	0		absent	22	0	0	22	0	0	0	0	0	0.814814815	81.48	81.48
101	Kite	1	40°46'14.8"N, 111°51'18.6"W	Urban	Catalpa speciosa	Halyomorpha halys	N	NA	8/15/2019	2019	0	22	0	0	0	0	0	0	22	0	0	0	0	22	0	0	0	0	Light fuzz over eggs	absent	22	0	0	22	0	0	0	0	0	1	100	100
102	Kite	1	40°46'14.8"N, 111°51'18.6"W	Urban	Catalpa speciosa	Halyomorpha halys	N	NA	8/15/2019	2019	0	19	0	0	9	0	0	0	4	0	1	5	0	19	0	0	0	0		absent	4	0	0	4	0	0	0	0	0	0.210526316	21.05	21.05							NJFR
118	Kite	1	40°46'14.8"N, 111°51'18.6"W	Urban	Catalpa speciosa	Halyomorpha halys	N	NA	8/19/2019	2019	0	13	0	0	0	0	0	0	13	0	0	0	0	13	0	0	0	0		absent	13	0	0	13	0	0	0	0	0	1	100	100							NJFR
126	Kite	1	40°46'14.8"N, 111°51'18.6"W	Urban	Catalpa speciosa	Halyomorpha halys	N	NA	8/19/2019	2019	0	28	0	0	0	0	0	0	28	0	0	0	0	28	0	0	0	0	moldy…	absent	28	0	0	28	0	0	0	0	0	1	100	100							NJFR
137	Kite	1	40°46'14.8"N, 111°51'18.6"W	Urban	Catalpa speciosa	Halyomorpha halys	N	NA	9/6/2019	2019	0	28	0	0	0	0	0	0	28	0	0	0	0	28	0	0	0	0		absent	28	0	0	28	0	0	0	0	0	1	100	100							NJFR
138	Kite	1	40°46'14.8"N, 111°51'18.6"W	Urban	Catalpa speciosa	Halyomorpha halys	N	NA	9/6/2019	2019	0	26	0	2	22	0	0	0	2	0	0	0	0	26	0	0	0	0		absent	2	0	0	2	0	0	0	0	0	0.076923077	7.69	7.69							NJFR
139	Kite	1	40°46'14.8"N, 111°51'18.6"W	Urban	Catalpa speciosa	Halyomorpha halys	N	NA	9/6/2019	2019	0	26	0	0	0	0	0	0	22	0	1	3	0	26	0	0	0	0		absent	22	0	0	22	0	0	0	0	0	0.846153846	84.62	84.62							NJFR
141	Kite	1	40°46'14.8"N, 111°51'18.6"W	Urban	Catalpa speciosa	Halyomorpha halys	N	NA	9/6/2019	2019	0	26	0	0	4	0	0	0	20	0	0	2	0	26	0	0	0	0		absent	20	0	0	20	0	0	0	0	0	0.769230769	76.92	76.92							NJFR
142	Kite	1	40°46'14.8"N, 111°51'18.6"W	Urban	Catalpa speciosa	Halyomorpha halys	N	NA	9/6/2019	2019	0	26	3	0	1	0	0	0	8	0	0	14	0	26	0	0	0	0		absent	8	0	0	8	0	0	0	0	0	0.307692308	30.77	30.77							NJFR
8	Kite	1	40°46'14.8"N, 111°51'18.6"W	Urban	Catalpa speciosa	Halyomorpha halys	N	NA	6/22/2017	2017	0	28	21	0	0	0	0	0	4	0	2	1	0	28	0	0	1	0	Collected same day observed	Anastatus mirabilis	4	0	4	0	4	0	0	0	0	0.142857143	14.29	14.29							NJFR
4	Kite	1	40°46'14.8"N, 111°51'18.6"W	Urban	Catalpa speciosa	Halyomorpha halys	N	NA	6/17/2019	2019	0	28	14	0	0	0	0	0	7	1	6	0	0	28	7	0	0	0	Anastatus mirabilis	Anastatus mirabilis	7	0	7	0	7	0	0	0	0	0.25	25	25							NJFR
37	Mango	16	40°46'23.0"N, 111°52'07.3"W	Urban	Catalpa speciosa	Halyomorpha halys	N	NA	7/3/2019	2019	0	27	7	0	0	0	0	0	6	3	11	0	0	20	9	0	1	1	Seems to be anastatus mirabilis (2 males?!) 4 females	Anastatus mirabilis	6	0	6	0	6	0	0	0	0	0.222222222	22.22	22.22							UTW
40	Mango	16	40°46'23.0"N, 111°52'07.3"W	Urban	Catalpa speciosa	Halyomorpha halys	N	NA	7/3/2019	2019	0	27	2	0	6	0	0	0	1	0	0	18	0	27	15	1	2	0	Anastatus mirabilis emerged	Anastatus mirabilis	1	0	1	0	1	0	0	0	0	0.037037037	3.7	3.7							NJFR
68	Kite	1	40°46'14.8"N, 111°51'18.6"W	Urban	Catalpa speciosa	Halyomorpha halys	N	NA	6/26/2018	2018	0	27	0	0	0	0	0	0	7	4	1	15	0	20	0	0	8	0		Anastatus reduvii	7	0	7	0	0	0	7	0	0	0.259259259	25.93	25.93							NJFR
8	Kite	1	40°46'14.8"N, 111°51'18.6"W	Urban	Catalpa speciosa	Halyomorpha halys	N	NA	6/17/2019	2019	0	28	0	0	0	0	0	0	28	0	0	0	0	28	0	0	0	0	T.j.!!!!!	Trissolcus japonicus	28	28	0	0	0	0	0	0	0	1	100	100							UTW
10	Kite	1	40°46'14.8"N, 111°51'18.6"W	Urban	Catalpa speciosa	Halyomorpha halys	N	NA	6/17/2019	2019	0	27	1	0	0	0	0	0	21	0	5	0	0	27	0	0	4	1	T.j.!!!!!	Trissolcus japonicus	21	21	0	0	0	0	0	0	0	0.777777778	77.78	77.78
11	Kite	1	40°46'14.8"N, 111°51'18.6"W	Urban	Catalpa speciosa	Halyomorpha halys	N	NA	6/17/2019	2019	0	26	0	0	17	0	0	0	2	0	1	6	0	26	6	0	0	1	T.j.!!!!!	Trissolcus japonicus	2	2	0	0	0	0	0	0	0	0.076923077	7.69	7.69
59	Kite	1	40°46'14.8"N, 111°51'18.6"W	Urban	Catalpa speciosa	Halyomorpha halys	N	NA	7/12/2019	2019	0	23	0	0	2	0	0	0	16	1	0	4	0	23	5	0	0	0	T.j.!!!!!	Trissolcus japonicus	16	16	0	0	0	0	0	0	0	0.695652174	69.57	69.57
61	Kite	1	40°46'14.8"N, 111°51'18.6"W	Urban	Catalpa speciosa	Halyomorpha halys	N	NA	7/12/2019	2019	0	28	0	0	0	0	0	0	10	0	8	10	0	28	9	1	0	8	Tj	Trissolcus japonicus	10	10	0	0	0	0	0	0	0	0.357142857	35.71	35.71
76	Kite	1	40°46'14.8"N, 111°51'18.6"W	Urban	Catalpa speciosa	Halyomorpha halys	N	NA	8/7/2019	2019	0	25	0	0	0	0	0	0	25	0	0	0	0	25	0	0	0	0	T.j. confirmed. There may be a missing emerged wasp, but all eggs had parasitoid emerge from them	Trissolcus japonicus	25	25	0	0	0	0	0	0	0	1	100	100
77	Kite	1	40°46'14.8"N, 111°51'18.6"W	Urban	Catalpa speciosa	Halyomorpha halys	N	NA	8/7/2019	2019	0	28	0	0	0	0	0	0	17	0	0	11	0	28	0	0	0	0	Tj	Trissolcus japonicus	17	17	0	0	0	0	0	0	0	0.607142857	60.71	60.71
98	Kite	1	40°46'14.8"N, 111°51'18.6"W	Urban	Catalpa speciosa	Halyomorpha halys	N	NA	8/15/2019	2019	0	28	0	0	0	0	0	0	17	0	0	0	0	17	0	0	0	0	T.j. At least 17 parasitoids hatched. Everything covered in brown fungi/mold. Need someone to look at	Trissolcus japonicus	17	17	0	0	0	0	0	0	0	0.607142857	60.71	60.71
106	Kite	1	40°46'14.8"N, 111°51'18.6"W	Urban	Catalpa speciosa	Halyomorpha halys	N	NA	8/15/2019	2019	0	28	3	0	0	0	0	0	19	0	4	2	0	28	0	0	0	0	Tj	Trissolcus japonicus	19	19	0	0	0	0	0	0	0	0.678571429	67.86	67.86
114	Kite	1	40°46'14.8"N, 111°51'18.6"W	Urban	Catalpa speciosa	Halyomorpha halys	N	NA	8/19/2019	2019	0	28	0	0	0	0	0	0	27	1	0	0	0	28	0	0	0	0	T.j.	Trissolcus japonicus	27	27	0	0	0	0	0	0	0	0.964285714	96.43	96.43
116	Kite	1	40°46'14.8"N, 111°51'18.6"W	Urban	Catalpa speciosa	Halyomorpha halys	N	NA	8/19/2019	2019	0	28	0	0	0	0	0	0	28	0	0	0	0	28	0	0	0	0	T.j.	Trissolcus japonicus	28	28	0	0	0	0	0	0	0	1	100	100
117	Kite	1	40°46'14.8"N, 111°51'18.6"W	Urban	Catalpa speciosa	Halyomorpha halys	N	NA	8/19/2019	2019	0	28	0	0	0	0	0	0	21	0	1	6	0	28	0	0	0	0	T.j. Also there's brown dirt/fuzz/mold growing out of about 3 eggs. Some mold on wasps.	Trissolcus japonicus	21	21	0	0	0	0	0	0	0	0.75	75	75
119	Kite	1	40°46'14.8"N, 111°51'18.6"W	Urban	Catalpa speciosa	Halyomorpha halys	N	NA	8/19/2019	2019	0	28	0	0	0	0	0	0	28	0	0	0	0	28	0	0	0	0	T.j.	Trissolcus japonicus	28	28	0	0	0	0	0	0	0	1	100	100
121	Kite	1	40°46'14.8"N, 111°51'18.6"W	Urban	Catalpa speciosa	Halyomorpha halys	N	NA	8/19/2019	2019	0	28	1	0	0	0	0	0	21	4	0	2	0	28	0	0	0	0	Tj	Trissolcus japonicus	21	21	0	0	0	0	0	0	0	0.75	75	75
125	Kite	1	40°46'14.8"N, 111°51'18.6"W	Urban	Catalpa speciosa	Halyomorpha halys	N	NA	8/19/2019	2019	0	28	0	0	0	0	0	0	27	0	0	1	0	28	0	0	0	0	T.j.	Trissolcus japonicus	27	27	0	0	0	0	0	0	0	0.964285714	96.43	96.43
129	Kite	1	40°46'14.8"N, 111°51'18.6"W	Urban	Catalpa speciosa	Halyomorpha halys	N	NA	8/30/2019	2019	0	28	0	0	0	0	0	0	28	0	0	0	0	28	0	0	0	0	T.j (guarding female)	Trissolcus japonicus	28	28	0	0	0	0	0	0	0	1	100	100
131	Kite	1	40°46'14.8"N, 111°51'18.6"W	Urban	Catalpa speciosa	Halyomorpha halys	N	NA	8/30/2019	2019	0	28	0	0	0	0	0	0	27	1	0	0	0	28	0	0	0	0	T.j.	Trissolcus japonicus	27	27	0	0	0	0	0	0	0	0.964285714	96.43	96.43
136	Kite	1	40°46'14.8"N, 111°51'18.6"W	Urban	Catalpa speciosa	Halyomorpha halys	N	NA	8/30/2019	2019	0	27	0	0	0	0	0	0	26	0	0	1	0	27	0	0	0	0	Primary Female is T.j. Secondary Female also T.j.	Trissolcus japonicus	26	26	0	0	0	0	0	0	0	0.962962963	96.3	96.3
144	Kite	1	40°46'14.8"N, 111°51'18.6"W	Urban	Catalpa speciosa	Halyomorpha halys	N	NA	9/6/2019	2019	0	27	3	0	0	0	0	0	11	0	9	4	0	27	0	0	0	0	T.j.	Trissolcus japonicus	11	11	0	0	0	0	0	0	0	0.407407407	40.74	40.74
145	Kite	1	40°46'14.8"N, 111°51'18.6"W	Urban	Catalpa speciosa	Halyomorpha halys	N	NA	9/6/2019	2019	0	27	0	0	0	0	0	0	25	0	0	2	0	27	0	0	0	0	T.j.	Trissolcus japonicus	25	25	0	0	0	0	0	0	0	0.925925926	92.59	92.59
96	Dance	17	40°46'49.3"N, 111°53'46.5"W	Urban	Catalpa speciosa	Halyomorpha halys	N	NA	8/15/2019	2019	0	28	0	0	0	0	0	0	28	0	0	0	0	28	0	0	0	0	T.j.	Trissolcus japonicus	28	28	0	0	0	0	0	0	0	1	100	100
7	Kite	1	40°46'14.8"N, 111°51'18.6"W	Urban	Catalpa speciosa	Halyomorpha halys	N	NA	6/22/2017	2017	0	27	18	0	0	0	0	0	0	0	6	0	3	27	0	0	6	0			0	0	0	0	0	0	0	0	0	0	0	0				Telenomus podisi
9	Kite	1	40°46'14.8"N, 111°51'18.6"W	Urban	Catalpa speciosa	Halyomorpha halys	N	NA	7/3/2017	2017	0	25	25	0	0	0	0	0	0	0	0	0	0	25	0	0	0	0	Collected same day observed/ all hatched, didn’t keep		0	0	0	0	0	0	0	0	0	0	0	0				Telenomus podisi
25	Kite	1	40°46'14.8"N, 111°51'18.6"W	Urban	Catalpa speciosa	Halyomorpha halys	N	7/18/2017	7/20/2017	2017	0	28	19	0	0	0	0	0	0	0	9	0	0	28	0	0	9	0			0	0	0	0	0	0	0	0	0	0	0	0
79	Kite	1	40°46'14.8"N, 111°51'18.6"W	Urban	Catalpa speciosa	Halyomorpha halys	N	NA	7/12/2018	2018	0	28	23	0	0	0	0	0	0	0	5	0	0	5	1	0	0	0	Found parasitoid wasp on egg mass			0	0	0	0	0	0	0	0	0	0	0
82	Kite	1	40°46'14.8"N, 111°51'18.6"W	Urban	Catalpa speciosa	Halyomorpha halys	N	NA	7/26/2018	2018	0	28	10	0	2	3	0	0	0	0	13	0	0	13	0	0	2	0				0	0	0	0	0	0	0	0	0	0	0
83	Kite	1	40°46'14.8"N, 111°51'18.6"W	Urban	Catalpa speciosa	Halyomorpha halys	N	NA	7/26/2018	2018	0	28	24	0	0	0	0	0	0	2	2	0	0	4	0	0	2	0				0	0	0	0	0	0	0	0	0	0	0
84	Kite	1	40°46'14.8"N, 111°51'18.6"W	Urban	Catalpa speciosa	Halyomorpha halys	N	NA	7/26/2018	2018	0	29	0	1	28	0	0	0	0	0	0	0	0	0	0	0	0	0				0	0	0	0	0	0	0	0	0	0	0
1	Kite	1	40°46'14.8"N, 111°51'18.6"W	Urban	Catalpa speciosa	Halyomorpha halys	N	NA	6/17/2019	2019	0	28	27	0	0	0	0	0	0	0	1	0	0	28	0	0	0	1			0	0	0	0	0	0	0	0	0	0	0	0							WILD
2	Kite	1	40°46'14.8"N, 111°51'18.6"W	Urban	Catalpa speciosa	Halyomorpha halys	N	NA	6/17/2019	2019	0	28	27	0	0	0	0	0	0	1	0	0	0	28	0	0	0	1			0	0	0	0	0	0	0	0	0	0	0	0							WILD
3	Kite	1	40°46'14.8"N, 111°51'18.6"W	Urban	Catalpa speciosa	Halyomorpha halys	N	NA	6/17/2019	2019	0	28	26	0	0	0	0	0	0	0	1	1	0	28	1	0	0	1			0	0	0	0	0	0	0	0	0	0	0	0							WILD
6	Kite	1	40°46'14.8"N, 111°51'18.6"W	Urban	Catalpa speciosa	Halyomorpha halys	N	NA	6/17/2019	2019	0	26	26	0	0	0	0	0	0	0	0	0	0	28	0	0	0	0			0	0	0	0	0	0	0	0	0	0	0	0				Trissolcus sp.			WILD
34	Kite	1	40°46'14.8"N, 111°51'18.6"W	Urban	Catalpa speciosa	Halyomorpha halys	N	NA	6/24/2019	2019	0	28	26	0	1	0	0	0	0	0	1	0	0	28	0	0	0	1			0	0	0	0	0	0	0	0	0	0	0	0
35	Kite	1	40°46'14.8"N, 111°51'18.6"W	Urban	Catalpa speciosa	Halyomorpha halys	N	NA	6/26/2019	2019	0	28	28	0	0	0	0	0	0	0	0	0	0	28	0	0	0	0			0	0	0	0	0	0	0	0	0	0	0	0
36	Kite	1	40°46'14.8"N, 111°51'18.6"W	Urban	Catalpa speciosa	Halyomorpha halys	N	NA	6/26/2019	2019	0	28	26	0	0	0	0	0	0	0	2	0	0	28	0	0	0	2			0	0	0	0	0	0	0	0	0	0	0	0
41	Kite	1	40°46'14.8"N, 111°51'18.6"W	Urban	Catalpa speciosa	Halyomorpha halys	N	NA	7/3/2019	2019	0	18	16	0	0	0	0	0	0	0	0	2	0	18	2	0	0	0			0	0	0	0	0	0	0	0	0	0	0	0
42	Kite	1	40°46'14.8"N, 111°51'18.6"W	Urban	Catalpa speciosa	Halyomorpha halys	N	NA	7/3/2019	2019	0	28	24	0	0	0	0	0	0	0	1	3	0	28	3	0	0	1			0	0	0	0	0	0	0	0	0	0	0	0
43	Kite	1	40°46'14.8"N, 111°51'18.6"W	Urban	Catalpa speciosa	Halyomorpha halys	N	NA	7/3/2019	2019	0	28	23	0	4	0	0	0	0	0	1	0	0	28	0	0	0	1			0	0	0	0	0	0	0	0	0	0	0	0
44	Kite	1	40°46'14.8"N, 111°51'18.6"W	Urban	Catalpa speciosa	Halyomorpha halys	N	NA	7/3/2019	2019	0	8	7	0	0	0	0	0	0	0	1	0	0	8	0	0	0	1			0	0	0	0	0	0	0	0	0	0	0	0
45	Kite	1	40°46'14.8"N, 111°51'18.6"W	Urban	Catalpa speciosa	Halyomorpha halys	N	NA	7/3/2019	2019	0	28	20	0	0	0	0	0	0	0	2	6	0	28	6	0	0	2			0	0	0	0	0	0	0	0	0	0	0	0
46	Kite	1	40°46'14.8"N, 111°51'18.6"W	Urban	Catalpa speciosa	Halyomorpha halys	N	NA	7/3/2019	2019	0	28	28	0	0	0	0	0	0	0	0	0	0	28	0	0	0	0			0	0	0	0	0	0	0	0	0	0	0	0
60	Kite	1	40°46'14.8"N, 111°51'18.6"W	Urban	Catalpa speciosa	Halyomorpha halys	N	NA	7/12/2019	2019	0	28	6	0	0	0	0	0	0	0	2	20	0	28	20	0	0	2			0	0	0	0	0	0	0	0	0	0	0	0
62	Kite	1	40°46'14.8"N, 111°51'18.6"W	Urban	Catalpa speciosa	Halyomorpha halys	N	NA	7/17/2019	2019	0	28	27	0	0	0	0	0	0	0	0	1	0	28	1	0	0	0			0	0	0	0	0	0	0	0	0	0	0	0
63	Kite	1	40°46'14.8"N, 111°51'18.6"W	Urban	Catalpa speciosa	Halyomorpha halys	N	NA	7/17/2019	2019	0	28	27	0	0	0	0	0	0	0	0	1	0	28	0	0	1	0			0	0	0	0	0	0	0	0	0	0	0	0
64	Kite	1	40°46'14.8"N, 111°51'18.6"W	Urban	Catalpa speciosa	Halyomorpha halys	N	NA	7/17/2019	2019	0	28	26	0	0	0	0	0	0	0	0	2	0	28	2	0	0	0			0	0	0	0	0	0	0	0	0	0	0	0
66	Kite	1	40°46'14.8"N, 111°51'18.6"W	Urban	Catalpa speciosa	Halyomorpha halys	N	NA	8/2/2019	2019	0	28	26	0	0	0	0	0	0	0	1	1	0	28	0	0	0	0			0	0	0	0	0	0	0	0	0	0	0	0
67	Kite	1	40°46'14.8"N, 111°51'18.6"W	Urban	Catalpa speciosa	Halyomorpha halys	N	NA	8/2/2019	2019	0	28	25	0	0	0	0	0	0	0	0	3	0	28	0	0	0	0			0	0	0	0	0	0	0	0	0	0	0	0
68	Kite	1	40°46'14.8"N, 111°51'18.6"W	Urban	Catalpa speciosa	Halyomorpha halys	N	NA	8/2/2019	2019	0	25	21	0	0	0	0	0	0	0	2	2	0	25	0	0	0	0			0	0	0	0	0	0	0	0	0	0	0	0
69	Kite	1	40°46'14.8"N, 111°51'18.6"W	Urban	Catalpa speciosa	Halyomorpha halys	N	NA	8/2/2019	2019	0	28	0	0	0	0	0	0	0	0	2	26	0	28	0	0	0	0			0	0	0	0	0	0	0	0	0	0	0	0
70	Kite	1	40°46'14.8"N, 111°51'18.6"W	Urban	Catalpa speciosa	Halyomorpha halys	N	NA	8/7/2019	2019	0	17	0	4	13	0	0	0	0	0	0	0	0	17	0	0	0	0			0	0	0	0	0	0	0	0	0	0	0	0
71	Kite	1	40°46'14.8"N, 111°51'18.6"W	Urban	Catalpa speciosa	Halyomorpha halys	N	NA	8/7/2019	2019	0	28	28	0	0	0	0	0	0	0	0	0	0	28	0	0	0	0			0	0	0	0	0	0	0	0	0	0	0	0
72	Kite	1	40°46'14.8"N, 111°51'18.6"W	Urban	Catalpa speciosa	Halyomorpha halys	N	NA	8/7/2019	2019	0	22	22	0	0	0	0	0	0	0	0	0	0	22	0	0	0	0	Looks like all hatched but about 5 show chewing or part of the egg cracked off		0	0	0	0	0	0	0	0	0	0	0	0
74	Kite	1	40°46'14.8"N, 111°51'18.6"W	Urban	Catalpa speciosa	Halyomorpha halys	N	NA	8/7/2019	2019	0	28	27	0	0	0	0	0	0	0	1	0	0	28	0	0	0	0			0	0	0	0	0	0	0	0	0	0	0	0
75	Kite	1	40°46'14.8"N, 111°51'18.6"W	Urban	Catalpa speciosa	Halyomorpha halys	N	NA	8/7/2019	2019	0	28	20	0	0	0	0	0	0	0	0	8	0	28	0	0	0	0			0	0	0	0	0	0	0	0	0	0	0	0
78	Kite	1	40°46'14.8"N, 111°51'18.6"W	Urban	Catalpa speciosa	Halyomorpha halys	N	NA	8/7/2019	2019	0	20	20	0	0	0	0	0	0	0	0	0	0	20	0	0	0	0	11-12 look hatched but also were either chewed or pieces of egg chipped off		0	0	0	0	0	0	0	0	0	0	0	0
80	Kite	1	40°46'14.8"N, 111°51'18.6"W	Urban	Catalpa speciosa	Halyomorpha halys	N	NA	8/7/2019	2019	0	28	26	0	0	0	0	0	0	0	2	0	0	28	0	0	0	0			0	0	0	0	0	0	0	0	0	0	0	0
81	Kite	1	40°46'14.8"N, 111°51'18.6"W	Urban	Catalpa speciosa	Halyomorpha halys	N	NA	8/7/2019	2019	0	25	16	0	2	0	0	0	0	0	0	7	0	25	0	0	0	0			0	0	0	0	0	0	0	0	0	0	0	0
82	Kite	1	40°46'14.8"N, 111°51'18.6"W	Urban	Catalpa speciosa	Halyomorpha halys	N	NA	8/7/2019	2019	0	24	13	0	0	0	0	0	0	4	0	7	0	24	0	0	0	0			0	0	0	0	0	0	0	0	0	0	0	0
86	Kite	1	40°46'14.8"N, 111°51'18.6"W	Urban	Catalpa speciosa	Halyomorpha halys	N	NA	8/7/2019	2019	0	28	28	0	0	0	0	0	0	0	0	0	0	28	0	0	0	0			0	0	0	0	0	0	0	0	0	0	0	0
90	Kite	1	40°46'14.8"N, 111°51'18.6"W	Urban	Catalpa speciosa	Halyomorpha halys	N	NA	8/7/2019	2019	0	28	15	0	12	0	0	0	0	0	0	1	0	28	0	0	0	0			0	0	0	0	0	0	0	0	0	0	0	0
91	Kite	1	40°46'14.8"N, 111°51'18.6"W	Urban	Catalpa speciosa	Halyomorpha halys	N	NA	8/7/2019	2019	0	25	20	0	0	0	0	0	0	0	2	3	0	25	0	0	0	0			0	0	0	0	0	0	0	0	0	0	0	0
92	Kite	1	40°46'14.8"N, 111°51'18.6"W	Urban	Catalpa speciosa	Halyomorpha halys	N	NA	8/7/2019	2019	0	25	20	0	0	0	0	0	0	0	5	0	0	25	0	0	0	0			0	0	0	0	0	0	0	0	0	0	0	0
93	Kite	1	40°46'14.8"N, 111°51'18.6"W	Urban	Catalpa speciosa	Halyomorpha halys	N	NA	8/7/2019	2019	0	25	25	0	0	0	0	0	0	0	0	3	0	28	0	0	0	0			0	0	0	0	0	0	0	0	0	0	0	0
94	Kite	1	40°46'14.8"N, 111°51'18.6"W	Urban	Catalpa speciosa	Halyomorpha halys	N	NA	8/7/2019	2019	0	28	28	0	0	0	0	0	0	0	0	0	0	28	0	0	0	0			0	0	0	0	0	0	0	0	0	0	0	0
97	Kite	1	40°46'14.8"N, 111°51'18.6"W	Urban	Catalpa speciosa	Halyomorpha halys	N	NA	8/15/2019	2019	0	28	26	0	0	0	0	0	0	0	0	2	0	28	0	0	0	0			0	0	0	0	0	0	0	0	0	0	0	0
100	Kite	1	40°46'14.8"N, 111°51'18.6"W	Urban	Catalpa speciosa	Halyomorpha halys	N	NA	8/15/2019	2019	0	28	28	0	0	0	0	0	0	0	0	0	0	28	0	0	0	0			0	0	0	0	0	0	0	0	0	0	0	0
103	Kite	1	40°46'14.8"N, 111°51'18.6"W	Urban	Catalpa speciosa	Halyomorpha halys	N	NA	8/15/2019	2019	0	28	12	0	2	0	0	0	0	0	7	7	0	28	0	0	0	0			0	0	0	0	0	0	0	0	0	0	0	0
104	Kite	1	40°46'14.8"N, 111°51'18.6"W	Urban	Catalpa speciosa	Halyomorpha halys	N	NA	8/15/2019	2019	0	28	27	0	0	0	0	0	0	0	1	0	0	28	0	0	0	0			0	0	0	0	0	0	0	0	0	0	0	0
105	Kite	1	40°46'14.8"N, 111°51'18.6"W	Urban	Catalpa speciosa	Halyomorpha halys	N	NA	8/15/2019	2019	0	28	28	0	0	0	0	0	0	0	0	0	0	28	0	0	0	0			0	0	0	0	0	0	0	0	0	0	0	0
107	Kite	1	40°46'14.8"N, 111°51'18.6"W	Urban	Catalpa speciosa	Halyomorpha halys	N	NA	8/15/2019	2019	0	28	26	0	0	0	0	0	0	0	0	2	0	28	0	0	0	0			0	0	0	0	0	0	0	0	0	0	0	0
108	Kite	1	40°46'14.8"N, 111°51'18.6"W	Urban	Catalpa speciosa	Halyomorpha halys	N	NA	8/15/2019	2019	0	28	24	0	0	0	0	0	0	0	1	3	0	28	0	0	0	0			0	0	0	0	0	0	0	0	0	0	0	0
109	Kite	1	40°46'14.8"N, 111°51'18.6"W	Urban	Catalpa speciosa	Halyomorpha halys	N	NA	8/15/2019	2019	0	29	4	0	0	0	0	0	0	1	6	18	0	29	0	0	0	0			0	0	0	0	0	0	0	0	0	0	0	0
110	Kite	1	40°46'14.8"N, 111°51'18.6"W	Urban	Catalpa speciosa	Halyomorpha halys	N	NA	8/15/2019	2019	0	28	26	0	0	0	0	0	0	0	2	0	0	28	0	0	0	0			0	0	0	0	0	0	0	0	0	0	0	0
112	Kite	1	40°46'14.8"N, 111°51'18.6"W	Urban	Catalpa speciosa	Halyomorpha halys	N	NA	8/19/2019	2019	0	28	28	0	0	0	0	0	0	0	0	0	0	28	0	0	0	0	1 partially hatched		0	0	0	0	0	0	0	0	0	0	0	0
113	Kite	1	40°46'14.8"N, 111°51'18.6"W	Urban	Catalpa speciosa	Halyomorpha halys	N	NA	8/19/2019	2019	0	26	25	0	0	0	0	0	0	0	1	0	0	26	0	0	0	0	3 partially hatched		0	0	0	0	0	0	0	0	0	0	0	0
115	Kite	1	40°46'14.8"N, 111°51'18.6"W	Urban	Catalpa speciosa	Halyomorpha halys	N	NA	8/19/2019	2019	0	28	24	0	0	0	0	0	0	0	4	0	0	28	0	0	0	0			0	0	0	0	0	0	0	0	0	0	0	0
120	Kite	1	40°46'14.8"N, 111°51'18.6"W	Urban	Catalpa speciosa	Halyomorpha halys	N	NA	8/19/2019	2019	0	28	7	0	0	0	0	0	0	1	4	16	0	28	0	0	0	0			0	0	0	0	0	0	0	0	0	0	0	0
123	Kite	1	40°46'14.8"N, 111°51'18.6"W	Urban	Catalpa speciosa	Halyomorpha halys	N	NA	8/19/2019	2019	0	28	10	0	0	0	0	0	0	0	1	17	0	28	0	0	0	0	1 mostly hatched.		0	0	0	0	0	0	0	0	0	0	0	0
124	Kite	1	40°46'14.8"N, 111°51'18.6"W	Urban	Catalpa speciosa	Halyomorpha halys	N	NA	8/19/2019	2019	0	28	20	0	0	0	0	0	0	0	5	3	0	28	0	0	0	0			0	0	0	0	0	0	0	0	0	0	0	0
127	Kite	1	40°46'14.8"N, 111°51'18.6"W	Urban	Catalpa speciosa	Halyomorpha halys	N	NA	8/19/2019	2019	0	28	26	0	0	0	0	0	0	0	0	0	2	28	0	0	0	0			0	0	0	0	0	0	0	0	0	0	0	0
128	Kite	1	40°46'14.8"N, 111°51'18.6"W	Urban	Catalpa speciosa	Halyomorpha halys	N	NA	8/30/2019	2019	0	28	28	0	0	0	0	0	0	0	0	0	0	28	0	0	0	0			0	0	0	0	0	0	0	0	0	0	0	0
130	Kite	1	40°46'14.8"N, 111°51'18.6"W	Urban	Catalpa speciosa	Halyomorpha halys	N	NA	8/30/2019	2019	0	18	0	0	8	0	0	0	0	1	0	9	0	18	0	0	0	0			0	0	0	0	0	0	0	0	0	0	0	0
132	Kite	1	40°46'14.8"N, 111°51'18.6"W	Urban	Catalpa speciosa	Halyomorpha halys	N	NA	8/30/2019	2019	0	25	23	0	0	0	0	0	0	1	1	0	0	25	0	0	0	0			0	0	0	0	0	0	0	0	0	0	0	0
133	Kite	1	40°46'14.8"N, 111°51'18.6"W	Urban	Catalpa speciosa	Halyomorpha halys	N	NA	8/30/2019	2019	0	27	15	0	1	0	0	0	0	0	5	6	0	27	0	0	0	0			0	0	0	0	0	0	0	0	0	0	0	0
134	Kite	1	40°46'14.8"N, 111°51'18.6"W	Urban	Catalpa speciosa	Halyomorpha halys	N	NA	8/30/2019	2019	0	28	27	0	0	0	0	0	0	0	0	1	0	28	0	0	0	0			0	0	0	0	0	0	0	0	0	0	0	0
135	Kite	1	40°46'14.8"N, 111°51'18.6"W	Urban	Catalpa speciosa	Halyomorpha halys	N	NA	8/30/2019	2019	0	27	12	0	0	0	0	0	0	0	0	15	0	27	0	0	0	0			0	0	0	0	0	0	0	0	0	0	0	0
143	Kite	1	40°46'14.8"N, 111°51'18.6"W	Urban	Catalpa speciosa	Halyomorpha halys	N	NA	9/6/2019	2019	0	28	21	0	0	0	0	0	0	0	3	4	0	28	0	0	0	0			0	0	0	0	0	0	0	0	0	0	0	0
140	Kite	1	40°46'14.8"N, 111°51'18.6"W	Urban	Catalpa speciosa	Halyomorpha halys	N	NA	9/13/2019	2019	0	27	27	0	0	0	0	0	0	0	0	0	0	27	0	0	0	0			0	0	0	0	0	0	0	0	0	0	0	0
78	Uranium	13	41°03'37.0"N, 111°58'13.8"W	Urban	Catalpa speciosa	Halyomorpha halys	N	NA	7/25/2018	2018	0	24	13	0	5	0	0	0	0	0	2	4	0	6	0	0	1	0	Found parasitoid wasp on egg mass			0	0	0	0	0	0	0	0	0	0	0
38	Mango	16	40°46'23.0"N, 111°52'07.3"W	Urban	Catalpa speciosa	Halyomorpha halys	N	NA	7/3/2019	2019	0	28	23	0	0	0	0	0	0	0	5	0	0	28	0	0	5	0			0	0	0	0	0	0	0	0	0	0	0	0
39	Mango	16	40°46'23.0"N, 111°52'07.3"W	Urban	Catalpa speciosa	Halyomorpha halys	N	NA	7/3/2019	2019	0	28	26	0	0	0	0	0	0	0	2	0	0	28	0	0	0	2			0	0	0	0	0	0	0	0	0	0	0	0
29	USU	12	41°44'32.9"N, 111°48'32.8"W	Urban	Cercis canadensis	Halyomorpha halys	H	7/13/2018	7/16/2018	2018	0	28	19	0	0	0	0	0	0	0	1	8	0	9	0	0	8	0	Para flew off em - likely anastatus			0	0	0	0	0	0	0	0	0	0	0
30	USU	12	41°44'32.9"N, 111°48'32.8"W	Urban	Cercis canadensis	Halyomorpha halys	H	7/20/2018	7/23/2018	2018	0	28	0	0	0	0	0	0	0	28	0	0	0	28	0	0	0	0				0	0	0	0	0	0	0	0	0	0	0
31	USU	12	41°44'32.9"N, 111°48'32.8"W	Urban	Cercis canadensis	Halyomorpha halys	H	7/20/2018	7/23/2018	2018	0	28	23	0	0	0	0	0	0	0	5	0	0	5	0	0	0	0				0	0	0	0	0	0	0	0	0	0	0
32	USU	12	41°44'32.9"N, 111°48'32.8"W	Urban	Cercis canadensis	Halyomorpha halys	H	7/20/2018	7/23/2018	2018	0	9	0	0	0	0	0	0	0	9	0	0	0	9	0	0	0	0				0	0	0	0	0	0	0	0	0	0	0
33	USU	12	41°44'32.9"N, 111°48'32.8"W	Urban	Cercis canadensis	Halyomorpha halys	H	8/3/2018	8/6/2018	2018	0	27	22	0	0	0	0	0	0	2	3	0	0	5	0	0	3	0				0	0	0	0	0	0	0	0	0	0	0
34	USU	12	41°44'32.9"N, 111°48'32.8"W	Urban	Cercis canadensis	Halyomorpha halys	H	8/3/2018	8/6/2018	2018	0	17	9	0	0	0	0	0	0	2	6	0	0	8	0	0	6	0				0	0	0	0	0	0	0	0	0	0	0
39	USU	12	41°44'32.9"N, 111°48'32.8"W	Urban	Cercis canadensis	Halyomorpha halys	H	8/8/2018	8/10/2018	2018	0	28	10	0	0	0	0	0	0	9	9	0	0	18	0	0	18	0				0	0	0	0	0	0	0	0	0	0	0
40	USU	12	41°44'32.9"N, 111°48'32.8"W	Urban	Cercis canadensis	Halyomorpha halys	H	8/8/2018	8/10/2018	2018	0	28	14	0	0	0	0	0	0	12	2	0	0	14	0	0	19	0				0	0	0	0	0	0	0	0	0	0	0
41	USU	12	41°44'32.9"N, 111°48'32.8"W	Urban	Cercis canadensis	Halyomorpha halys	H	8/8/2018	8/10/2018	2018	0	28	5	0	0	0	0	0	0	6	17	0	0	23	0	0	21	0				0	0	0	0	0	0	0	0	0	0	0
92	USU	12	41°44'32.9"N, 111°48'32.8"W	Urban	Cercis canadensis	Halyomorpha halys	H	8/20/2018	8/22/2018	2018	0	24	16	0	0	0	0	0	0	0	8	0	0	8	0	0	7	0				0	0	0	0	0	0	0	0	0	0	0
93	USU	12	41°44'32.9"N, 111°48'32.8"W	Urban	Cercis canadensis	Halyomorpha halys	H	8/20/2018	8/22/2018	2018	0	25	20	0	0	0	0	0	0	0	3	2	0	5	0	0	5	0				0	0	0	0	0	0	0	0	0	0	0
94	USU	12	41°44'32.9"N, 111°48'32.8"W	Urban	Cercis canadensis	Halyomorpha halys	H	8/20/2018	8/22/2018	2018	0	28	10	0	0	0	0	0	0	1	12	5	0	18	0	0	17	0				0	0	0	0	0	0	0	0	0	0	0
95	USU	12	41°44'32.9"N, 111°48'32.8"W	Urban	Cercis canadensis	Halyomorpha halys	H	8/20/2018	8/22/2018	2018	0	24	1	0	0	0	0	0	0	10	12	1	0	23	0	0	21	0				0	0	0	0	0	0	0	0	0	0	0
96	USU	12	41°44'32.9"N, 111°48'32.8"W	Urban	Cercis canadensis	Halyomorpha halys	H	8/20/2018	8/22/2018	2018	0	24	12	0	0	0	0	0	0	8	1	3	0	12	0	0	6	0				0	0	0	0	0	0	0	0	0	0	0
97	USU	12	41°44'32.9"N, 111°48'32.8"W	Urban	Cercis canadensis	Halyomorpha halys	H	8/20/2018	8/22/2018	2018	0	28	27	0	0	0	0	0	0	0	0	1	0	1	0	0	2	0				0	0	0	0	0	0	0	0	0	0	0
98	USU	12	41°44'32.9"N, 111°48'32.8"W	Urban	Cercis canadensis	Halyomorpha halys	H	8/20/2018	8/22/2018	2018	0	28	26	0	0	0	0	0	0	0	1	1	0	2	0	0	2	0				0	0	0	0	0	0	0	0	0	0	0
99	USU	12	41°44'32.9"N, 111°48'32.8"W	Urban	Cercis canadensis	Halyomorpha halys	H	8/20/2018	8/22/2018	2018	0	19	0	0	0	0	0	0	0	0	8	2	9	10	0	0	12	0				0	0	0	0	0	0	0	0	0	0	0
100	USU	12	41°44'32.9"N, 111°48'32.8"W	Urban	Cercis canadensis	Halyomorpha halys	H	8/20/2018	8/22/2018	2018	0	27	8	0	0	0	0	0	0	0	10	2	7	12	3	0	6	0				0	0	0	0	0	0	0	0	0	0	0
101	USU	12	41°44'32.9"N, 111°48'32.8"W	Urban	Cercis canadensis	Halyomorpha halys	H	8/20/2018	8/22/2018	2018	0	26	14	0	0	0	0	0	0	2	7	3	0	12	1	0	9	0				0	0	0	0	0	0	0	0	0	0	0
59	2	4	41°44'11.685"N, 111°49'14.446"W	Urban	Elaeagnus angustifolia	Halyomorpha halys	H	8/24/2017	8/27/2017	2017	0	28	1	0	0	0	0	0	0	0	27	0	0	28	0	0	27	0			0	0	0	0	0	0	0	0	0	0	0	0
60	2	4	41°44'11.685"N, 111°49'14.446"W	Urban	Elaeagnus angustifolia	Halyomorpha halys	H	8/24/2017	8/27/2017	2017	0	26	1	0	0	0	0	0	0	0	20	0	0	26	0	0	20	0			0	0	0	0	0	0	0	0	0	0	0	0
69	2	4	41°44'11.685"N, 111°49'14.446"W	Urban	Elaeagnus angustifolia	Halyomorpha halys	H	8/29/2017	9/1/2017	2017	0	28	11	0	0	0	0	0	0	0	17	0	0	28	0	0	17	0			0	0	0	0	0	0	0	0	0	0	0	0
70	2	4	41°44'11.685"N, 111°49'14.446"W	Urban	Elaeagnus angustifolia	Halyomorpha halys	H	8/29/2017	9/1/2017	2017	0	27	5	0	0	0	0	0	0	0	19	0	0	27	0	0	19	0			0	0	0	0	0	0	0	0	0	0	0	0
71	2	4	41°44'11.685"N, 111°49'14.446"W	Urban	Elaeagnus angustifolia	Halyomorpha halys	H	8/29/2017	9/1/2017	2017	0	28	3	0	0	0	0	0	0	0	23	0	1	28	0	0	23	0			0	0	0	0	0	0	0	0	0	0	0	0
60	Grateful Tomato	11	40°45'08.2"N, 111°52'25.2"W	Urban	Helianthus annuus	Halyomorpha halys	H	10/3/2018	10/6/2018	2018	0	25	0	0	1	0	0	0	0	20	3	0	1	23	0	0	0	0				0	0	0	0	0	0	0	0	0	0	0
42	Kite	1	40°46'14.8"N, 111°51'18.6"W	Urban	Malus domestica	Halyomorpha halys	H	8/10/2018	8/13/2018	2018	0	17	3	0	0	0	0	0	1	11	2	0	0	13	0	0	11	0	Eggs from 8/9 - 1 Trissolcus colelcted on Egg mass	Trissolcus hullensis	1	0	1	0	0	0	0	0	1	0.058823529	5.88	0							NJFR
26	Kite	1	40°46'14.8"N, 111°51'18.6"W	Urban	Malus domestica	Halyomorpha halys	H	8/15/2017	8/17/2017	2017	0	5	2	0	0	0	0	0	0	0	3	0	0	5	3	0	0	0	2 of the goo was white		0	0	0	0	0	0	0	0	0	0	0	0
27	Kite	1	40°46'14.8"N, 111°51'18.6"W	Urban	Malus domestica	Halyomorpha halys	H	8/15/2017	8/17/2017	2017	0	27	13	0	0	0	0	0	0	1	12	1	0	27	0	0	13	0			0	0	0	0	0	0	0	0	0	0	0	0
28	Kite	1	40°46'14.8"N, 111°51'18.6"W	Urban	Malus domestica	Halyomorpha halys	H	8/15/2017	8/17/2017	2017	0	25	17	0	0	0	0	0	0	0	3	6	0	25	0	0	8	0	1 empty white		0	0	0	0	0	0	0	0	0	0	0	0
29	Kite	1	40°46'14.8"N, 111°51'18.6"W	Urban	Malus domestica	Halyomorpha halys	H	8/15/2017	8/17/2017	2017	0	28	14	0	0	0	0	0	0	0	5	9	0	28	0	0	12	0	2 empty white egg		0	0	0	0	0	0	0	0	0	0	0	0
30	Kite	1	40°46'14.8"N, 111°51'18.6"W	Urban	Malus domestica	Halyomorpha halys	H	8/15/2017	8/17/2017	2017	0	21	2	0	0	0	0	0	0	13	2	2	3	21	3	0	1	0			0	0	0	0	0	0	0	0	0	0	0	0
31	Kite	1	40°46'14.8"N, 111°51'18.6"W	Urban	Malus domestica	Halyomorpha halys	H	8/15/2017	8/17/2017	2017	0	23	9	0	0	0	0	0	0	0	2	12	0	23	0	0	12	0	2 white empty		0	0	0	0	0	0	0	0	0	0	0	0
32	Kite	1	40°46'14.8"N, 111°51'18.6"W	Urban	Malus domestica	Halyomorpha halys	H	8/15/2017	8/17/2017	2017	0	28	16	0	0	0	0	0	0	1	1	10	0	28	1	0	10	0			0	0	0	0	0	0	0	0	0	0	0	0
33	Kite	1	40°46'14.8"N, 111°51'18.6"W	Urban	Malus domestica	Halyomorpha halys	H	8/15/2017	8/17/2017	2017	0	28	2	0	0	0	0	0	0	0	0	26	0	28	0	0	26	0			0	0	0	0	0	0	0	0	0	0	0	0
34	Kite	1	40°46'14.8"N, 111°51'18.6"W	Urban	Malus domestica	Halyomorpha halys	H	8/15/2017	8/17/2017	2017	0	23	5	0	0	0	0	0	0	2	16	0	0	23	0	0	2	0	14 empty		0	0	0	0	0	0	0	0	0	0	0	0
35	Kite	1	40°46'14.8"N, 111°51'18.6"W	Urban	Malus domestica	Halyomorpha halys	H	8/15/2017	8/17/2017	2017	0	28	13	0	0	0	0	0	0	1	1	13	0	28	0	0	13	0	1 empty		0	0	0	0	0	0	0	0	0	0	0	0
36	Kite	1	40°46'14.8"N, 111°51'18.6"W	Urban	Malus domestica	Halyomorpha halys	H	8/15/2017	8/17/2017	2017	0	28	6	0	0	0	0	0	0	0	0	22	0	28	0	0	22	0			0	0	0	0	0	0	0	0	0	0	0	0
37	Kite	1	40°46'14.8"N, 111°51'18.6"W	Urban	Malus domestica	Halyomorpha halys	H	8/15/2017	8/17/2017	2017	0	28	2	0	0	0	0	0	0	15	4	7	0	28	0	0	7	0	4 empty		0	0	0	0	0	0	0	0	0	0	0	0
38	Kite	1	40°46'14.8"N, 111°51'18.6"W	Urban	Malus domestica	Halyomorpha halys	H	8/15/2017	8/17/2017	2017	0	28	4	0	0	0	0	0	0	9	9	6	0	28	3	0	3	0	9 empty		0	0	0	0	0	0	0	0	0	0	0	0
39	Kite	1	40°46'14.8"N, 111°51'18.6"W	Urban	Malus domestica	Halyomorpha halys	H	8/15/2017	8/17/2017	2017	0	17	13	0	0	0	0	0	0	0	2	2	0	17	2	0	0	0	2 empty		0	0	0	0	0	0	0	0	0	0	0	0
40	Kite	1	40°46'14.8"N, 111°51'18.6"W	Urban	Malus domestica	Halyomorpha halys	H	8/15/2017	8/17/2017	2017	0	7	0	0	0	0	0	0	0	6	1	0	0	7	0	0	0	0	1 empty		0	0	0	0	0	0	0	0	0	0	0	0
41	Kite	1	40°46'14.8"N, 111°51'18.6"W	Urban	Malus domestica	Halyomorpha halys	H	8/15/2017	8/17/2017	2017	0	5	0	0	0	0	0	0	0	4	0	0	1	5	0	0	0	0	same results as first assessment		0	0	0	0	0	0	0	0	0	0	0	0
45	Kite	1	40°46'14.8"N, 111°51'18.6"W	Urban	Malus domestica	Halyomorpha halys	H	8/10/2018	8/13/2018	2018	0	11	5	0	0	0	0	0	0	3	2	1	0	6	0	0	4	0				0	0	0	0	0	0	0	0	0	0	0
46	Kite	1	40°46'14.8"N, 111°51'18.6"W	Urban	Malus domestica	Halyomorpha halys	H	8/10/2018	8/13/2018	2018	0	12	3	0	0	0	0	0	0	3	6	0	0	9	0	0	10	0				0	0	0	0	0	0	0	0	0	0	0
19	Grateful Tomato	11	40°45'08.2"N, 111°52'25.2"W	Tree Fruit	Malus domestica	Halyomorpha halys	H	7/3/2018	7/6/2018	2018	0	23	4	0	0	0	0	0	0	12	6	1	0	19	1	0	18	0	1 Triccolcus on EM			0	0	0	0	0	0	0	0	0	0	0
21	Grateful Tomato	11	40°45'08.2"N, 111°52'25.2"W	Tree Fruit	Malus domestica	Halyomorpha halys	H	7/3/2018	7/6/2018	2018	0	25	8	0	0	0	0	0	0	13	4	0	0	17	0	0	11	0	1 Trissolcus on EM			0	0	0	0	0	0	0	0	0	0	0
25	Grateful Tomato	11	40°45'08.2"N, 111°52'25.2"W	Tree Fruit	Malus domestica	Halyomorpha halys	H	7/6/2018	7/11/2018	2018	0	28	21	0	0	0	0	0	0	0	0	7	0	7	0	0	7	0				0	0	0	0	0	0	0	0	0	0	0
35	Grateful Tomato	11	40°45'08.2"N, 111°52'25.2"W	Tree Fruit	Malus domestica	Halyomorpha halys	H	8/6/2018	8/9/2018	2018	0	27	16	0	0	0	0	0	0	1	9	0	1	10	0	0	4	0				0	0	0	0	0	0	0	0	0	0	0
36	Grateful Tomato	11	40°45'08.2"N, 111°52'25.2"W	Tree Fruit	Malus domestica	Halyomorpha halys	H	8/6/2018	8/9/2018	2018	0	25	24	0	0	0	0	0	0	0	0	1	0	1	0	0	1	0				0	0	0	0	0	0	0	0	0	0	0
48	Grateful Tomato	11	40°45'08.2"N, 111°52'25.2"W	Urban	Malus domestica	Halyomorpha halys	H	9/5/2018	9/7/2018	2018	0	28	1	0	0	0	0	0	0	21	0	6	0	27	0	0	12	0				0	0	0	0	0	0	0	0	0	0	0
49	Grateful Tomato	11	40°45'08.2"N, 111°52'25.2"W	Urban	Malus domestica	Halyomorpha halys	H	9/12/2018	9/16/2018	2018	0	27	0	0	0	0	0	0	0	18	0	0	9	18	0	0	0	0				0	0	0	0	0	0	0	0	0	0	0
50	Grateful Tomato	11	40°45'08.2"N, 111°52'25.2"W	Urban	Malus domestica	Halyomorpha halys	H	9/12/2018	9/16/2018	2018	0	27	0	3	2	0	0	0	0	9	0	0	13	9	0	0	6	0				0	0	0	0	0	0	0	0	0	0	0
51	Grateful Tomato	11	40°45'08.2"N, 111°52'25.2"W	Urban	Malus domestica	Halyomorpha halys	H	9/12/2018	9/16/2018	2018	0	25	10	0	0	0	0	0	0	5	0	10	0	15	0	0	11	0	Trissolcus female collected on EM			0	0	0	0	0	0	0	0	0	0	0				Trissolcus sp.
52	Grateful Tomato	11	40°45'08.2"N, 111°52'25.2"W	Urban	Malus domestica	Halyomorpha halys	H	9/12/2018	9/16/2018	2018	0	23	0	0	0	0	0	0	0	23	0	0	0	23	0	0	0	0				0	0	0	0	0	0	0	0	0	0	0
58	Grateful Tomato	11	40°45'08.2"N, 111°52'25.2"W	Urban	Malus domestica	Halyomorpha halys	H	10/3/2018	10/6/2018	2018	0	14	5	0	0	0	0	0	0	4	1	2	2	7	0	0	2	0				0	0	0	0	0	0	0	0	0	0	0
59	Grateful Tomato	11	40°45'08.2"N, 111°52'25.2"W	Urban	Malus domestica	Halyomorpha halys	H	10/3/2018	10/6/2018	2018	0	15	11	0	3	0	0	0	0	0	0	1	0	1	0	0	0	0				0	0	0	0	0	0	0	0	0	0	0
28	Grateful Tomato	11	40°45'08.2"N, 111°52'25.2"W	Urban	Malus domestica	Halyomorpha halys	H	6/21/2019	6/24/2019	2019	0	25	17	0	0	0	0	0	0	0	0	8	0	25	8	0	0	0			0	0	0	0	0	0	0	0	0	0	0	0
29	Grateful Tomato	11	40°45'08.2"N, 111°52'25.2"W	Urban	Malus domestica	Halyomorpha halys	H	6/21/2019	6/24/2019	2019	0	26	3	0	0	0	0	0	0	17	0	6	0	26	6	0	0	0			0	0	0	0	0	0	0	0	0	0	0	0
30	Grateful Tomato	11	40°45'08.2"N, 111°52'25.2"W	Urban	Malus domestica	Halyomorpha halys	H	6/21/2019	6/24/2019	2019	0	27	5	0	0	0	0	0	0	0	0	9	13	27	9	0	0	0	missing eggs most likely fell off leaf during field deployment		0	0	0	0	0	0	0	0	0	0	0	0
31	Grateful Tomato	11	40°45'08.2"N, 111°52'25.2"W	Urban	Malus domestica	Halyomorpha halys	H	6/21/2019	6/24/2019	2019	0	27	0	0	26	0	0	0	0	0	0	0	1	27	0	0	0	0			0	0	0	0	0	0	0	0	0	0	0	0
32	Grateful Tomato	11	40°45'08.2"N, 111°52'25.2"W	Urban	Malus domestica	Halyomorpha halys	H	6/21/2019	6/24/2019	2019	0	28	15	0	0	0	0	0	0	0	0	13	0	28	4	0	9	0	Trissolcus collected on egg mass		0	0	0	0	0	0	0	0	0	0	0	0				Trissolcus sp.
33	Grateful Tomato	11	40°45'08.2"N, 111°52'25.2"W	Urban	Malus domestica	Halyomorpha halys	H	6/21/2019	6/24/2019	2019	5	23	21	0	0	0	0	0	0	0	2	0	0	23	0	0	0	2			0	0	0	0	0	0	0	0	0	0	0	0
79	5	7	41°1'18.787"N, 111°55'59.663"W	Tree Fruit	Malus domestica 'Gala'	Halyomorpha halys	H	8/31/2017	9/3/2017	2017	0	28	13	0	0	0	0	0	0	0	15	0	0	28	0	0	15	0			0	0	0	0	0	0	0	0	0	0	0	0
80	5	7	41°1'18.787"N, 111°55'59.663"W	Tree Fruit	Malus domestica 'Gala'	Halyomorpha halys	H	8/31/2017	9/3/2017	2017	0	28	0	0	0	0	0	0	0	0	28	0	0	28	0	0	28	0			0	0	0	0	0	0	0	0	0	0	0	0
81	5	7	41°1'18.787"N, 111°55'59.663"W	Tree Fruit	Malus domestica 'Gala'	Halyomorpha halys	H	8/31/2017	9/3/2017	2017	0	28	20	0	0	0	0	0	0	0	7	0	0	28	0	0	7	0			0	0	0	0	0	0	0	0	0	0	0	0
82	5	7	41°1'18.787"N, 111°55'59.663"W	Tree Fruit	Malus domestica 'Gala'	Halyomorpha halys	H	8/31/2017	9/3/2017	2017	0	26	12	0	0	0	0	0	0	0	14	0	0	26	0	0	14	0			0	0	0	0	0	0	0	0	0	0	0	0
83	5	7	41°1'18.787"N, 111°55'59.663"W	Tree Fruit	Malus domestica 'Gala'	Halyomorpha halys	H	8/31/2017	9/3/2017	2017	0	15	2	0	0	0	0	0	0	0	13	0	0	15	0	0	13	0			0	0	0	0	0	0	0	0	0	0	0	0
90	5	7	41°1'18.787"N, 111°55'59.663"W	Tree Fruit	Malus domestica 'Gala'	Halyomorpha halys	H	9/7/2017	9/10/2017	2017	0	26	14	0	0	0	0	0	0	0	12	0	0	26	0	0	12	0			0	0	0	0	0	0	0	0	0	0	0	0
91	5	7	41°1'18.787"N, 111°55'59.663"W	Tree Fruit	Malus domestica 'Gala'	Halyomorpha halys	H	9/7/2017	9/10/2017	2017	0	25	11	0	0	0	0	0	0	0	14	0	0	25	0	0	14	0			0	0	0	0	0	0	0	0	0	0	0	0
92	5	7	41°1'18.787"N, 111°55'59.663"W	Tree Fruit	Malus domestica 'Gala'	Halyomorpha halys	H	9/7/2017	9/10/2017	2017	0	26	6	0	0	0	0	0	0	0	19	0	1	26	0	0	19	0			0	0	0	0	0	0	0	0	0	0	0	0
93	5	7	41°1'18.787"N, 111°55'59.663"W	Tree Fruit	Malus domestica 'Gala'	Halyomorpha halys	H	9/7/2017	9/10/2017	2017	0	28	9	0	0	0	0	0	0	0	18	0	0	28	0	0	18	0			0	0	0	0	0	0	0	0	0	0	0	0
94	5	7	41°1'18.787"N, 111°55'59.663"W	Tree Fruit	Malus domestica 'Gala'	Halyomorpha halys	H	9/7/2017	9/10/2017	2017	0	25	1	0	0	0	0	0	0	0	22	0	0	25	0	0	22	0			0	0	0	0	0	0	0	0	0	0	0	0							WILD
95	5	7	41°1'18.787"N, 111°55'59.663"W	Tree Fruit	Malus domestica 'Gala'	Halyomorpha halys	H	9/7/2017	9/10/2017	2017	0	12	1	0	0	0	0	0	0	0	8	0	0	12	0	0	8	0			0	0	0	0	0	0	0	0	0	0	0	0
86	Charlie	8	40°16'07.6"N, 111°39'20.7"W	Urban	Malus sp.	Halyomorpha halys	H	8/13/2018	8/16/2018	2018	0	23	0	0	9	0	0	0	0	11	3	0	0	14	0	0	0	0				0	0	0	0	0	0	0	0	0	0	0
87	Charlie	8	40°16'07.6"N, 111°39'20.7"W	Urban	Malus sp.	Halyomorpha halys	H	8/13/2018	8/16/2018	2018	0	15	0	0	1	0	0	0	0	14	0	0	0	14	0	0	0	0				0	0	0	0	0	0	0	0	0	0	0
88	Charlie	8	40°16'07.6"N, 111°39'20.7"W	Urban	Malus sp.	Halyomorpha halys	H	8/13/2018	8/16/2018	2018	0	28	0	0	0	0	0	0	0	28	0	0	0	28	0	0	0	0				0	0	0	0	0	0	0	0	0	0	0
89	Charlie	8	40°16'07.6"N, 111°39'20.7"W	Urban	Malus sp.	Halyomorpha halys	H	8/13/2018	8/16/2018	2018	0	17	0	0	0	0	0	0	0	2	15	0	0	17	0	0	0	0	parasitoid was present			0	0	0	0	0	0	0	0	0	0	0
90	Charlie	8	40°16'07.6"N, 111°39'20.7"W	Urban	Malus sp.	Halyomorpha halys	H	8/13/2018	8/16/2018	2018	0	13	0	0	0	0	0	0	0	12	1	0	0	13	0	0	10	0				0	0	0	0	0	0	0	0	0	0	0
91	Charlie	8	40°16'07.6"N, 111°39'20.7"W	Urban	Malus sp.	Halyomorpha halys	H	8/13/2018	8/16/2018	2018	0	26	0	0	0	0	0	0	0	25	1	0	0	26	0	0	17	0				0	0	0	0	0	0	0	0	0	0	0
20	Grateful Tomato	11	40°45'08.2"N, 111°52'25.2"W	Tree Fruit	Prunus armeniaca	Halyomorpha halys	H	7/3/2018	7/6/2018	2018	0	20	0	0	0	0	0	0	0	17	0	0	3	17	0	0	0	0				0	0	0	0	0	0	0	0	0	0	0
22	Grateful Tomato	11	40°45'08.2"N, 111°52'25.2"W	Tree Fruit	Prunus armeniaca	Halyomorpha halys	H	7/3/2018	7/6/2018	2018	0	21	2	0	3	0	1	0	0	13	2	0	0	15	0	0	15	0				0	0	0	0	0	0	0	0	0	0	0
23	Grateful Tomato	11	40°45'08.2"N, 111°52'25.2"W	Tree Fruit	Prunus armeniaca	Halyomorpha halys	H	7/3/2018	7/6/2018	2018	3	25	11	0	4	0	0	0	0	1	2	10	0	13	0	0	11	0	1 Trissolcus guarding, 1 sac spider on EM			0	0	0	0	0	0	0	0	0	0	0
26	Grateful Tomato	11	40°45'08.2"N, 111°52'25.2"W	Tree Fruit	Prunus armeniaca	Halyomorpha halys	H	7/6/2018	7/11/2018	2018	0	27	0	4	2	0	0	0	0	0	0	0	21	0	0	0	0	0				0	0	0	0	0	0	0	0	0	0	0
37	Grateful Tomato	11	40°45'08.2"N, 111°52'25.2"W	Tree Fruit	Prunus armeniaca	Halyomorpha halys	H	8/6/2018	8/9/2018	2018	0	20	0	0	0	0	0	0	0	17	3	0	0	20	0	0	7	0				0	0	0	0	0	0	0	0	0	0	0
38	Grateful Tomato	11	40°45'08.2"N, 111°52'25.2"W	Tree Fruit	Prunus armeniaca	Halyomorpha halys	H	8/6/2018	8/9/2018	2018	0	28	19	0	0	0	0	0	0	2	7	0	0	9	0	0	3	0				0	0	0	0	0	0	0	0	0	0	0
25	Grateful Tomato	11	40°45'08.2"N, 111°52'25.2"W	Urban	Prunus armeniaca	Halyomorpha halys	H	6/21/2019	6/24/2019	2019	0	28	17	0	0	0	0	0	0	0	0	11	0	28	10	0	1	0			0	0	0	0	0	0	0	0	0	0	0	0
26	Grateful Tomato	11	40°45'08.2"N, 111°52'25.2"W	Urban	Prunus armeniaca	Halyomorpha halys	H	6/21/2019	6/24/2019	2019	0	27	2	0	0	0	0	0	0	0	0	25	0	27	25	0	0	0			0	0	0	0	0	0	0	0	0	0	0	0
27	Grateful Tomato	11	40°45'08.2"N, 111°52'25.2"W	Urban	Prunus armeniaca	Halyomorpha halys	H	6/21/2019	6/24/2019	2019	0	27	11	0	0	0	0	0	0	4	1	11	0	27	10	0	1	0			0	0	0	0	0	0	0	0	0	0	0	0
56	Grateful Tomato	11	40°45'08.2"N, 111°52'25.2"W	Urban	Prunus armeniaca	Halyomorpha halys	H	7/12/2019	7/17/2019	2019	0	26	11	0	0	0	0	0	0	1	9	4	1	26	5	0	7	2	Trissolcus collected on EM		0	0	0	0	0	0	0	0	0	0	0	0				Trissolcus sp.
57	Grateful Tomato	11	40°45'08.2"N, 111°52'25.2"W	Urban	Prunus armeniaca	Halyomorpha halys	H	7/12/2019	7/17/2019	2019	0	28	25	0	0	0	0	0	0	1	0	2	0	28	0	0	2	0			0	0	0	0	0	0	0	0	0	0	0	0
54	Kaysville	9	41°01'12.2"N, 111°55'49.4"W	Tree Fruit	Prunus cerasus	Halyomorpha halys	H	6/18/2018	6/21/2018	2018	0	20	15	0	0	0	0	0	0	0	5	0	0	5	0	0	4	0				0	0	0	0	0	0	0	0	0	0	0
55	Kaysville	9	41°01'12.2"N, 111°55'49.4"W	Tree Fruit	Prunus cerasus	Halyomorpha halys	H	6/18/2018	6/21/2018	2018	0	27	0	0	0	0	0	0	0	17	10	0	0	27	0	0	0	0				0	0	0	0	0	0	0	0	0	0	0
56	Kaysville	9	41°01'12.2"N, 111°55'49.4"W	Tree Fruit	Prunus cerasus	Halyomorpha halys	H	6/18/2018	6/21/2018	2018	0	27	5	0	0	0	0	0	0	11	3	8	0	22	5	0	7	0				0	0	0	0	0	0	0	0	0	0	0
57	Kaysville	9	41°01'12.2"N, 111°55'49.4"W	Tree Fruit	Prunus cerasus	Halyomorpha halys	H	6/18/2018	6/21/2018	2018	0	28	0	0	0	0	0	0	0	24	4	0	0	28	1	0	3	0				0	0	0	0	0	0	0	0	0	0	0
58	Kaysville	9	41°01'12.2"N, 111°55'49.4"W	Tree Fruit	Prunus cerasus	Halyomorpha halys	H	6/18/2018	6/21/2018	2018	0	28	0	0	0	0	0	0	0	7	4	17	0	28	4	0	6	0				0	0	0	0	0	0	0	0	0	0	0
59	Kaysville	9	41°01'12.2"N, 111°55'49.4"W	Tree Fruit	Prunus cerasus	Halyomorpha halys	H	6/18/2018	6/21/2018	2018	0	26	18	0	0	0	0	0	0	2	4	0	2	6	0	0	4	0	female wasp was present/guarding. It was inside Tart Cherry mesh bag			0	0	0	0	0	0	0	0	0	0	0				Trissolcus sp.
60	Kaysville	9	41°01'12.2"N, 111°55'49.4"W	Tree Fruit	Prunus cerasus	Halyomorpha halys	H	6/18/2018	6/21/2018	2018	0	24	18	0	0	0	0	0	0	2	4	0	0	6	0	0	4	0	Voltinism egg mass (F1) with parasitoid present/guarding (confirmed T. utahensis guarding)			0	0	0	0	0	0	0	0	0	0	0				Trissolcus utahensis
13	Kaysville	9	41°01'12.2"N, 111°55'49.4"W	Tree Fruit	Prunus cerasus	Halyomorpha halys	H	6/25/2018	6/28/2018	2018	4	24	3	0	0	4	0	0	0	4	6	11	0	21	0	0	16	0	Female Trissolcus coll on EM			0	0	0	0	0	0	0	0	0	0	0
14	Kaysville	9	41°01'12.2"N, 111°55'49.4"W	Tree Fruit	Prunus cerasus	Halyomorpha halys	H	6/25/2018	6/28/2018	2018	0	22	0	0	0	0	0	0	0	16	2	4	0	22	0	0	13	0	Female Telenomus sp. Coll on EM			0	0	0	0	0	0	0	0	0	0	0
15	Kaysville	9	41°01'12.2"N, 111°55'49.4"W	Tree Fruit	Prunus cerasus	Halyomorpha halys	H	6/25/2018	6/28/2018	2018	0	24	0	0	0	0	0	0	0	23	0	1	0	24	0	0	11	0				0	0	0	0	0	0	0	0	0	0	0
16	Kaysville	9	41°01'12.2"N, 111°55'49.4"W	Tree Fruit	Prunus cerasus	Halyomorpha halys	H	6/25/2018	6/28/2018	2018	0	20	19	0	0	0	0	0	0	1	0	0	0	1	0	0	1	0				0	0	0	0	0	0	0	0	0	0	0
17	Kaysville	9	41°01'12.2"N, 111°55'49.4"W	Tree Fruit	Prunus cerasus	Halyomorpha halys	H	6/25/2018	6/28/2018	2018	1	28	22	0	0	0	0	0	0	1	0	5	0	6	0	0	5	0				0	0	0	0	0	0	0	0	0	0	0
66	Kaysville	9	41°01'12.2"N, 111°55'49.4"W	Tree Fruit	Prunus cerasus	Halyomorpha halys	N	NA	6/25/2018	2018	0	28	0	0	0	0	0	0	0	9	0	19	0	28	0	0	26	0	It was thought parasitoids were present in eggs, found out this was not true after 6 week dissections			0	0	0	0	0	0	0	0	0	0	0
65	Kaysville	9	41°01'12.2"N, 111°55'49.4"W	Tree Fruit	Prunus cerasus	Halyomorpha halys	N	NA	7/25/2019	2019	0	28	0	0	0	0	0	0	0	0	0	28	0	28	0	0	0	0	In a Fruit Damage Bag		0	0	0	0	0	0	0	0	0	0	0	0
23	Grateful Tomato	11	40°45'08.2"N, 111°52'25.2"W	Urban	Prunus domestica	Halyomorpha halys	H	6/21/2019	6/24/2019	2019	0	27	17	0	0	0	0	0	0	0	1	9	0	27	9	0	0	1			0	0	0	0	0	0	0	0	0	0	0	0
24	Grateful Tomato	11	40°45'08.2"N, 111°52'25.2"W	Urban	Prunus domestica	Halyomorpha halys	H	6/21/2019	6/24/2019	2019	0	28	6	0	0	0	0	0	0	0	0	22	0	28	22	0	0	0			0	0	0	0	0	0	0	0	0	0	0	0
58	Grateful Tomato	11	40°45'08.2"N, 111°52'25.2"W	Urban	Prunus domestica	Halyomorpha halys	H	7/12/2019	7/17/2019	2019	0	28	27	0	0	0	0	0	0	0	1	0	0	28	0	0	1	0			0	0	0	0	0	0	0	0	0	0	0	0
87	4	6	41°11'9.164"N, 112°2'25.368"W	Tree Fruit	Prunus persica	Halyomorpha halys	H	9/7/2017	9/10/2017	2017	0	26	0	0	0	0	0	0	2	0	24	0	0	26	0	0	24	0	Trissolcus coll on EM	Trissolcus euschisti	2	0	2	0	0	0	0	2	0	0.076923077	7.69	0							NJFR
75	4	6	41°11'9.164"N, 112°2'25.368"W	Tree Fruit	Prunus persica	Halyomorpha halys	H	8/31/2017	9/3/2017	2017	0	28	3	0	0	0	0	0	2	0	23	0	0	28	0	0	23	0	Para flew off	Trissolcus euschisti	2	0	2	0	0	0	0	2	0	0.071428571	7.14	0							NJFR
76	4	6	41°11'9.164"N, 112°2'25.368"W	Tree Fruit	Prunus persica	Halyomorpha halys	H	8/31/2017	9/3/2017	2017	0	28	0	0	0	0	0	0	3	0	25	0	0	28	0	0	25	0	Para flew off	Trissolcus euschisti	3	0	3	0	0	0	0	3	0	0.107142857	10.71	0							NJFR
74	4	6	41°11'9.164"N, 112°2'25.368"W	Tree Fruit	Prunus persica	Halyomorpha halys	H	8/31/2017	9/3/2017	2017	0	28	0	0	0	0	0	0	0	0	28	0	0	28	0	0	28	0			0	0	0	0	0	0	0	0	0	0	0	0
77	4	6	41°11'9.164"N, 112°2'25.368"W	Tree Fruit	Prunus persica	Halyomorpha halys	H	8/31/2017	9/3/2017	2017	0	28	1	0	0	0	0	0	0	0	27	0	0	28	0	0	27	0			0	0	0	0	0	0	0	0	0	0	0	0
78	4	6	41°11'9.164"N, 112°2'25.368"W	Tree Fruit	Prunus persica	Halyomorpha halys	H	8/31/2017	9/3/2017	2017	0	30	6	0	0	0	0	0	0	0	24	0	0	30	0	0	24	0			0	0	0	0	0	0	0	0	0	0	0	0
84	4	6	41°11'9.164"N, 112°2'25.368"W	Tree Fruit	Prunus persica	Halyomorpha halys	H	9/7/2017	9/10/2017	2017	0	28	0	0	0	0	0	0	0	0	24	0	4	28	0	0	24	0			0	0	0	0	0	0	0	0	0	0	0	0
85	4	6	41°11'9.164"N, 112°2'25.368"W	Tree Fruit	Prunus persica	Halyomorpha halys	H	9/7/2017	9/10/2017	2017	0	35	11	0	0	0	0	0	0	0	12	0	0	35	0	0	12	0			0	0	0	0	0	0	0	0	0	0	0	0
86	4	6	41°11'9.164"N, 112°2'25.368"W	Tree Fruit	Prunus persica	Halyomorpha halys	H	9/7/2017	9/10/2017	2017	0	28	4	0	0	0	0	0	0	0	24	0	0	28	0	0	24	0			0	0	0	0	0	0	0	0	0	0	0	0
88	4	6	41°11'9.164"N, 112°2'25.368"W	Tree Fruit	Prunus persica	Halyomorpha halys	H	9/7/2017	9/10/2017	2017	0	28	4	0	0	0	0	0	0	0	24	0	0	28	0	0	24	0			0	0	0	0	0	0	0	0	0	0	0	0
89	4	6	41°11'9.164"N, 112°2'25.368"W	Tree Fruit	Prunus persica	Halyomorpha halys	H	9/7/2017	9/10/2017	2017	0	29	1	0	0	0	0	0	0	0	23	0	0	29	0	0	23	0			0	0	0	0	0	0	0	0	0	0	0	0
2	4 (Roy)	6	41°11'9.164"N, 112°2'25.368"W	Tree Fruit	Prunus persica	Halyomorpha halys	H	5/31/2018	6/4/2018	2018	0	24	2	0	0	0	0	0	0	6	4	12	0	22	0	0	14	0				0	0	0	0	0	0	0	0	0	0	0
5	4 (Roy)	6	41°11'9.164"N, 112°2'25.368"W	Tree Fruit	Prunus persica	Halyomorpha halys	H	6/7/2018	6/11/2018	2018	0	28	0	0	1	0	0	0	0	23	1	0	3	24	0	0	1	0				0	0	0	0	0	0	0	0	0	0	0
8	4 (Roy)	6	41°11'9.164"N, 112°2'25.368"W	Tree Fruit	Prunus persica	Halyomorpha halys	H	6/7/2018	6/11/2018	2018	0	11	4	0	0	0	0	0	0	3	4	0	0	7	0	0	6	0				0	0	0	0	0	0	0	0	0	0	0
53	4 (Roy)	6	41°11'9.164"N, 112°2'25.368"W	Tree Fruit	Prunus persica	Halyomorpha halys	H	9/26/2018	10/1/2018	2018	0	21	0	0	0	0	0	0	0	21	0	0	0	21	0	0	0	0				0	0	0	0	0	0	0	0	0	0	0
54	4 (Roy)	6	41°11'9.164"N, 112°2'25.368"W	Tree Fruit	Prunus persica	Halyomorpha halys	H	9/26/2018	10/1/2018	2018	0	24	0	0	0	0	0	0	0	24	0	0	0	24	0	0	13	0				0	0	0	0	0	0	0	0	0	0	0
55	4 (Roy)	6	41°11'9.164"N, 112°2'25.368"W	Tree Fruit	Prunus persica	Halyomorpha halys	H	9/26/2018	10/1/2018	2018	0	29	14	0	0	0	0	0	0	9	1	4	1	14	0	0	1	0				0	0	0	0	0	0	0	0	0	0	0
74	Velo	10	40°59'44.2"N, 111°53'09.8"W	wooded edge by no crop	Robinia pseudoacacia	Halyomorpha halys	H	7/10/2018	7/12/2018	2018	0	28	10	0	0	0	0	0	0	1	16	1	0	18	2	0	16	0				0	0	0	0	0	0	0	0	0	0	0
75	Velo	10	40°59'44.2"N, 111°53'09.8"W	wooded edge by no crop	Robinia pseudoacacia	Halyomorpha halys	H	7/10/2018	7/12/2018	2018	0	27	6	0	0	0	0	0	0	4	9	8	0	21	2	0	19	0				0	0	0	0	0	0	0	0	0	0	0
76	Velo	10	40°59'44.2"N, 111°53'09.8"W	wooded edge by no crop	Robinia pseudoacacia	Halyomorpha halys	H	7/10/2018	7/12/2018	2018	0	18	4	0	0	0	0	0	0	9	3	0	2	12	6	0	5	0				0	0	0	0	0	0	0	0	0	0	0
105	3	5	41°43'41.968"N, 111°49'4.005"W	Urban	Sambucus sp.	Halyomorpha halys	H	9/9/2017	9/12/2017	2017	0	28	10	0	0	0	0	0	0	0	8	0	0	28	0	0	8	0			0	0	0	0	0	0	0	0	0	0	0	0
106	3	5	41°43'41.968"N, 111°49'4.005"W	Urban	Sambucus sp.	Halyomorpha halys	H	9/9/2017	9/12/2017	2017	0	28	4	0	0	0	0	0	0	0	23	0	0	28	0	0	23	0			0	0	0	0	0	0	0	0	0	0	0	0
107	3	5	41°43'41.968"N, 111°49'4.005"W	Urban	Sambucus sp.	Halyomorpha halys	H	9/9/2017	9/12/2017	2017	0	27	2	0	0	0	0	0	0	0	25	0	0	27	0	0	25	0			0	0	0	0	0	0	0	0	0	0	0	0
117	3	5	41°43'41.968"N, 111°49'4.005"W	Urban	Sambucus sp.	Halyomorpha halys	H	9/14/2017	9/17/2017	2017	0	28	22	0	0	0	0	0	0	0	6	0	0	28	0	0	6	0			0	0	0	0	0	0	0	0	0	0	0	0				Trissolcus japonicus	Trissolcus japonicus
118	3	5	41°43'41.968"N, 111°49'4.005"W	Urban	Sambucus sp.	Halyomorpha halys	H	9/14/2017	9/17/2017	2017	0	29	4	0	0	0	0	0	0	0	25	0	0	29	0	0	25	0			0	0	0	0	0	0	0	0	0	0	0	0
119	3	5	41°43'41.968"N, 111°49'4.005"W	Urban	Sambucus sp.	Halyomorpha halys	H	9/14/2017	9/17/2017	2017	0	28	0	0	0	0	0	0	0	0	0	0	0	28	0	0	0	0			0	0	0	0	0	0	0	0	0	0	0	0
54	1	3	41°45'48.39"N, 111°48'46.148"W	Vegetable Crop	Zea mays	Halyomorpha halys	H	8/24/2017	8/27/2017	2017	0	28	3	0	0	0	0	0	0	0	25	0	0	28	0	0	25	0			0	0	0	0	0	0	0	0	0	0	0	0
55	1	3	41°45'48.39"N, 111°48'46.148"W	Vegetable Crop	Zea mays	Halyomorpha halys	H	8/24/2017	8/27/2017	2017	0	28	24	0	0	0	0	0	0	0	4	0	0	28	0	0	4	0			0	0	0	0	0	0	0	0	0	0	0	0
56	1	3	41°45'48.39"N, 111°48'46.148"W	Vegetable Crop	Zea mays	Halyomorpha halys	H	8/24/2017	8/27/2017	2017	0	28	4	0	0	0	0	0	0	0	24	0	0	28	0	0	24	0			0	0	0	0	0	0	0	0	0	0	0	0
57	1	3	41°45'48.39"N, 111°48'46.148"W	Vegetable Crop	Zea mays	Halyomorpha halys	H	8/24/2017	8/27/2017	2017	0	22	1	0	0	0	0	0	0	0	21	0	0	22	0	0	21	0			0	0	0	0	0	0	0	0	0	0	0	0
58	1	3	41°45'48.39"N, 111°48'46.148"W	Vegetable Crop	Zea mays	Halyomorpha halys	H	8/24/2017	8/27/2017	2017	0	28	7	0	0	0	0	0	0	0	21	0	0	28	0	0	21	0			0	0	0	0	0	0	0	0	0	0	0	0
64	1	3	41°45'48.39"N, 111°48'46.148"W	Vegetable Crop	zea mays	Halyomorpha halys	H	8/29/2017	9/1/2017	2017	0	23	0	0	0	0	0	0	0	0	23	0	0	23	0	0	23	0			0	0	0	0	0	0	0	0	0	0	0	0
65	1	3	41°45'48.39"N, 111°48'46.148"W	Vegetable Crop	zea mays	Halyomorpha halys	H	8/29/2017	9/1/2017	2017	0	27	2	0	0	0	0	0	0	0	25	0	0	27	0	0	25	0			0	0	0	0	0	0	0	0	0	0	0	0
66	1	3	41°45'48.39"N, 111°48'46.148"W	Vegetable Crop	zea mays	Halyomorpha halys	H	8/29/2017	9/1/2017	2017	0	27	1	0	0	0	0	0	0	0	26	0	0	27	0	0	26	0			0	0	0	0	0	0	0	0	0	0	0	0
67	1	3	41°45'48.39"N, 111°48'46.148"W	Vegetable Crop	zea mays	Halyomorpha halys	H	8/29/2017	9/1/2017	2017	0	26	0	0	0	0	0	0	0	0	26	0	0	26	0	0	26	0			0	0	0	0	0	0	0	0	0	0	0	0
68	1	3	41°45'48.39"N, 111°48'46.148"W	Vegetable Crop	zea mays	Halyomorpha halys	H	8/29/2017	9/1/2017	2017	0	23	1	0	0	0	0	0	0	0	22	0	0	23	0	0	22	0			0	0	0	0	0	0	0	0	0	0	0	0
96	1	3	41°45'48.39"N, 111°48'46.148"W	Vegetable Crop	zea mays	Halyomorpha halys	H	9/9/2017	9/12/2017	2017	0	28	0	0	0	0	0	0	0	0	28	0	0	28	0	0	28	0			0	0	0	0	0	0	0	0	0	0	0	0
97	1	3	41°45'48.39"N, 111°48'46.148"W	Vegetable Crop	zea mays	Halyomorpha halys	H	9/9/2017	9/12/2017	2017	0	26	3	0	0	0	0	0	0	0	23	0	0	26	0	0	23	0			0	0	0	0	0	0	0	0	0	0	0	0
98	1	3	41°45'48.39"N, 111°48'46.148"W	Vegetable Crop	zea mays	Halyomorpha halys	H	9/9/2017	9/12/2017	2017	0	27	12	0	0	0	0	0	0	0	15	0	0	27	0	0	15	0			0	0	0	0	0	0	0	0	0	0	0	0
99	1	3	41°45'48.39"N, 111°48'46.148"W	Vegetable Crop	zea mays	Halyomorpha halys	H	9/9/2017	9/12/2017	2017	0	26	0	0	0	0	0	0	0	0	26	0	0	26	0	0	26	0			0	0	0	0	0	0	0	0	0	0	0	0
100	1	3	41°45'48.39"N, 111°48'46.148"W	Vegetable Crop	zea mays	Halyomorpha halys	H	9/9/2017	9/12/2017	2017	0	28	10	0	0	0	0	0	0	0	18	0	0	28	0	0	18	0			0	0	0	0	0	0	0	0	0	0	0	0							WILD
101	1	3	41°45'48.39"N, 111°48'46.148"W	Vegetable Crop	zea mays	Halyomorpha halys	H	9/9/2017	9/12/2017	2017	0	28	11	0	0	0	0	0	0	0	17	0	0	28	0	0	17	0			0	0	0	0	0	0	0	0	0	0	0	0							WILD
108	1	3	41°45'48.39"N, 111°48'46.148"W	Vegetable Crop	zea mays	Halyomorpha halys	H	9/14/2017	9/17/2017	2017	0	26	2	0	0	0	0	0	0	0	24	0	0	26	0	0	24	0			0	0	0	0	0	0	0	0	0	0	0	0
109	1	3	41°45'48.39"N, 111°48'46.148"W	Vegetable Crop	zea mays	Halyomorpha halys	H	9/14/2017	9/17/2017	2017	0	23	6	0	0	0	0	0	0	0	17	0	0	23	0	0	17	0			0	0	0	0	0	0	0	0	0	0	0	0
110	1	3	41°45'48.39"N, 111°48'46.148"W	Vegetable Crop	zea mays	Halyomorpha halys	H	9/14/2017	9/17/2017	2017	0	17	4	0	0	0	0	0	0	0	13	0	0	17	0	0	13	0			0	0	0	0	0	0	0	0	0	0	0	0
111	1	3	41°45'48.39"N, 111°48'46.148"W	Vegetable Crop	zea mays	Halyomorpha halys	H	9/14/2017	9/17/2017	2017	0	18	0	0	0	0	0	0	0	0	18	0	0	18	0	0	18	0			0	0	0	0	0	0	0	0	0	0	0	0
112	1	3	41°45'48.39"N, 111°48'46.148"W	Vegetable Crop	zea mays	Halyomorpha halys	H	9/14/2017	9/17/2017	2017	0	27	2	0	0	0	0	0	0	0	25	0	0	27	0	0	25	0			0	0	0	0	0	0	0	0	0	0	0	0
113	1	3	41°45'48.39"N, 111°48'46.148"W	Vegetable Crop	zea mays	Halyomorpha halys	H	9/14/2017	9/17/2017	2017	0	25	15	0	0	1	0	0	0	0	9	0	0	25	0	0	9	0			0	0	0	0	0	0	0	0	0	0	0	0
53	Day Farm	2	41°3'36.899"N, 112°0'46.944"W	Row Crop	Zea mays	Halyomorpha halys	N	NA	8/23/2017	2017	0	28	24	0	0	0	0	0	0	0	4	0	0	28	0	0	4	0	Trissolcus collected on EM		0	0	0	0	0	0	0	0	0	0	0	0				Trissolcus sp.
